# Supplementary material for: Epithelial RAC1-dependent cytoskeleton dynamics controls cell mechanics, cell shedding and barrier integrity in intestinal inflammation
Source: PubMed Central journal article supplement — Gut. 2022 Mar 3;72(2):275–94. doi: 10.1136/gutjnl-2021-325520 (PMC9872254; doi:10.1136/gutjnl-2021-325520), 2022-03-03
Supplement: gutjnl-2021-325520supp002.pdf [file gutjnl-2021-325520supp002.pdf]

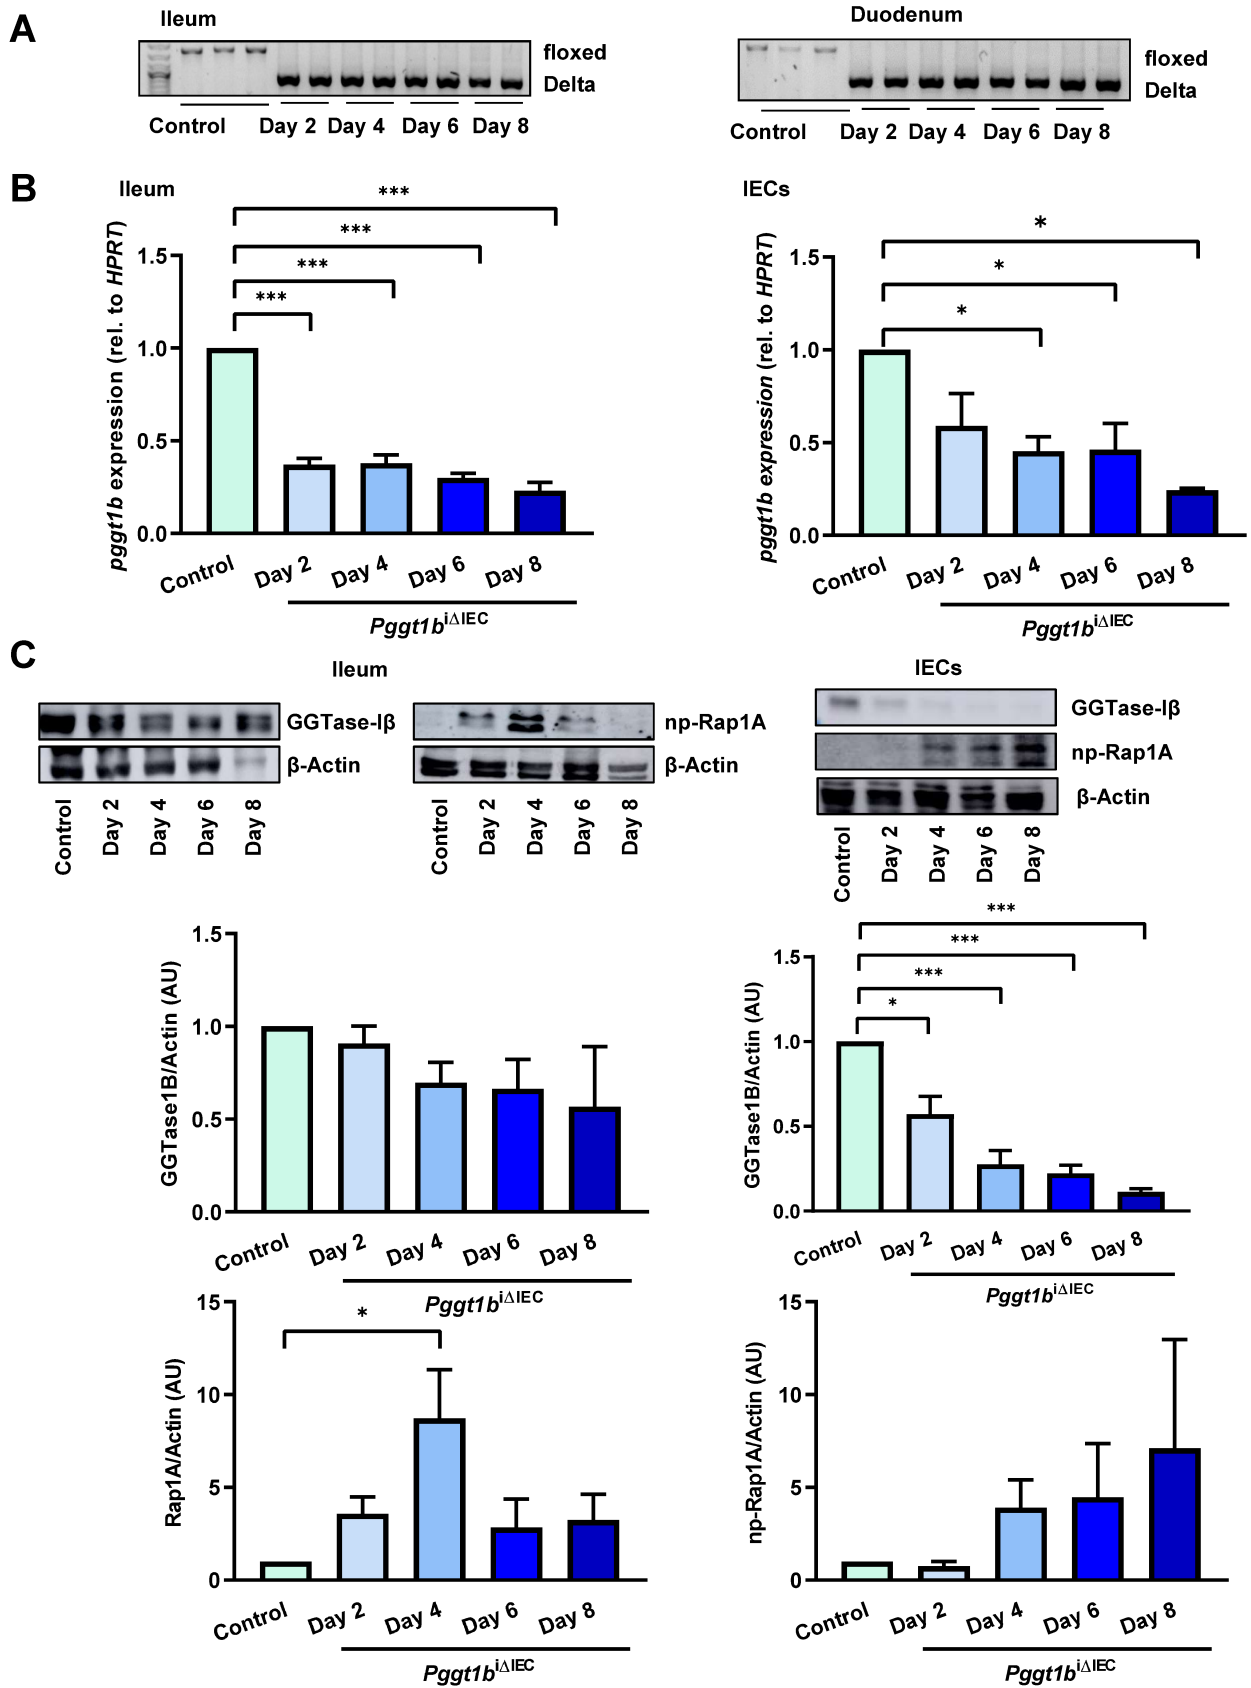

Suppl. Figure 1: Time-dependent generation of GGTase conditional KO mice

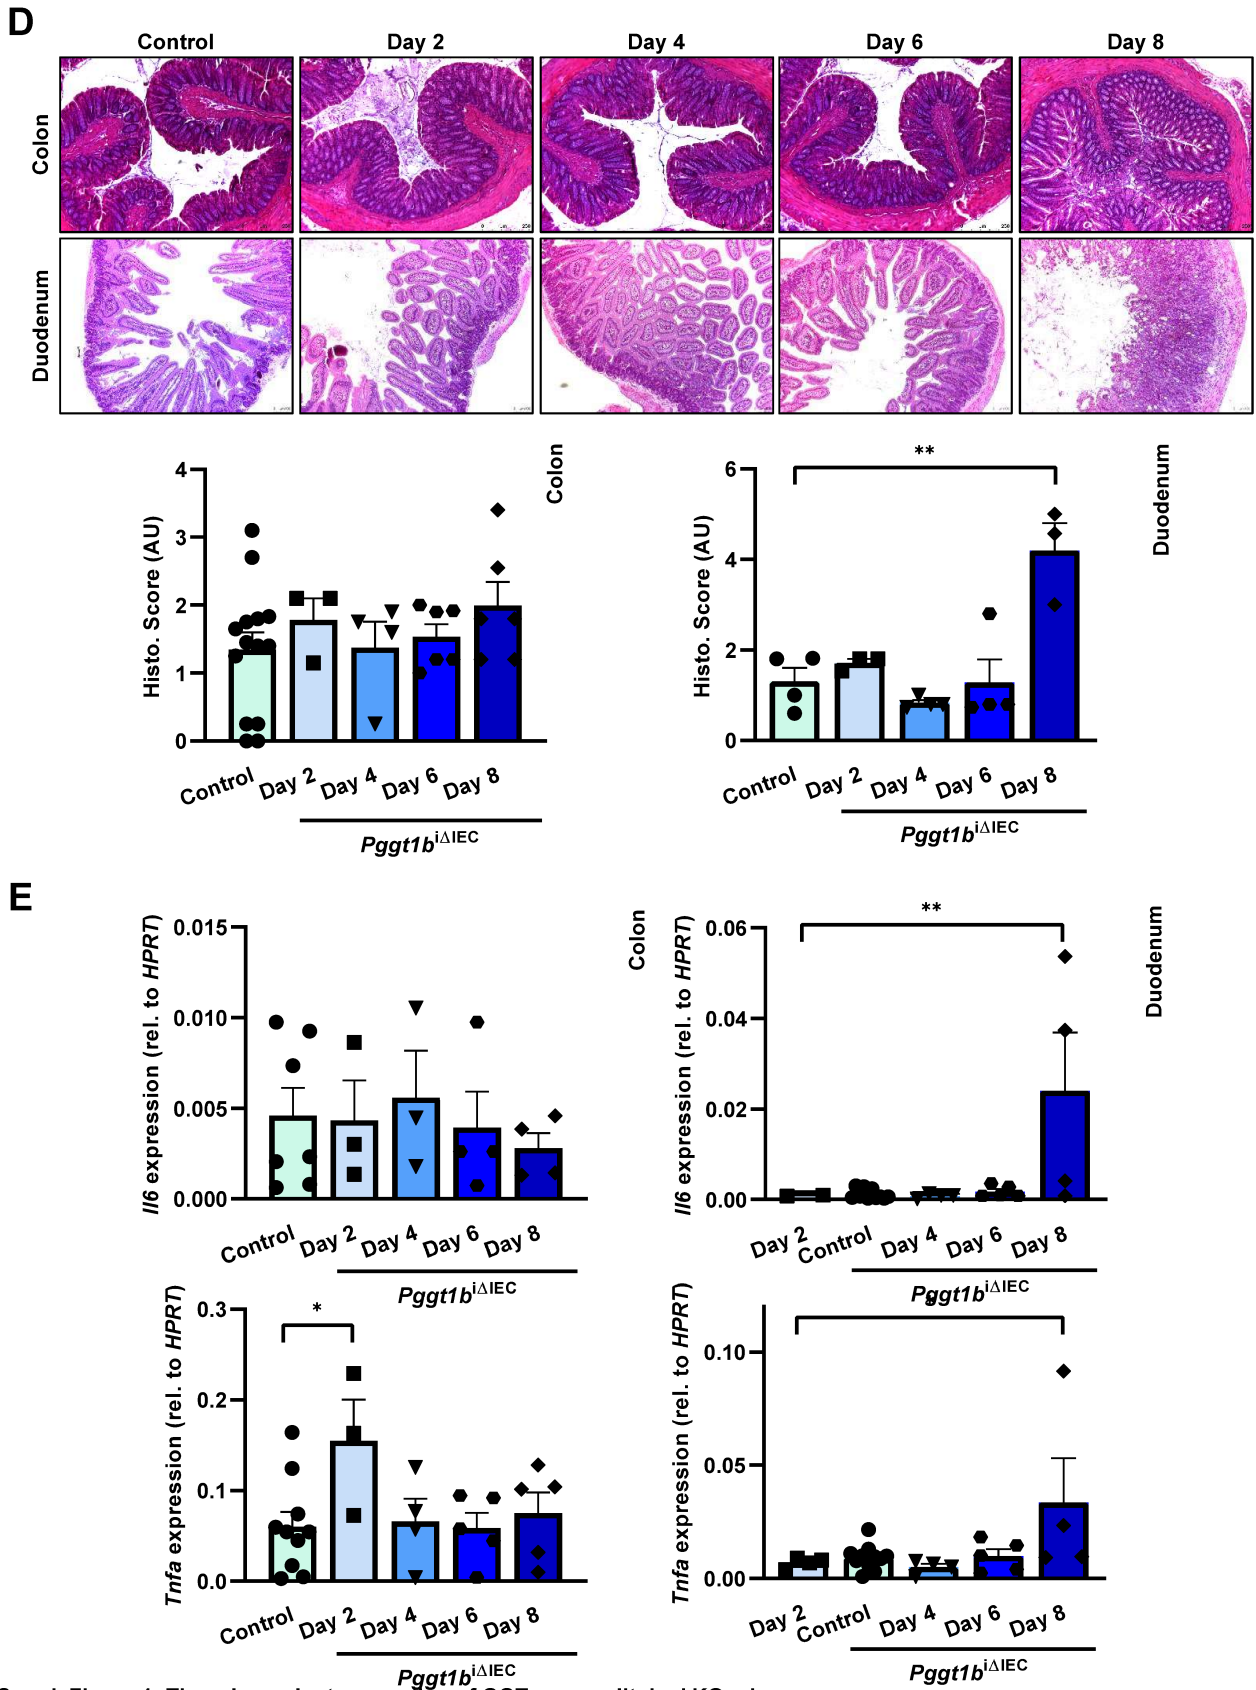

Suppl. Figure 1: Time-dependent generation of GGTase conditional KO mice

F

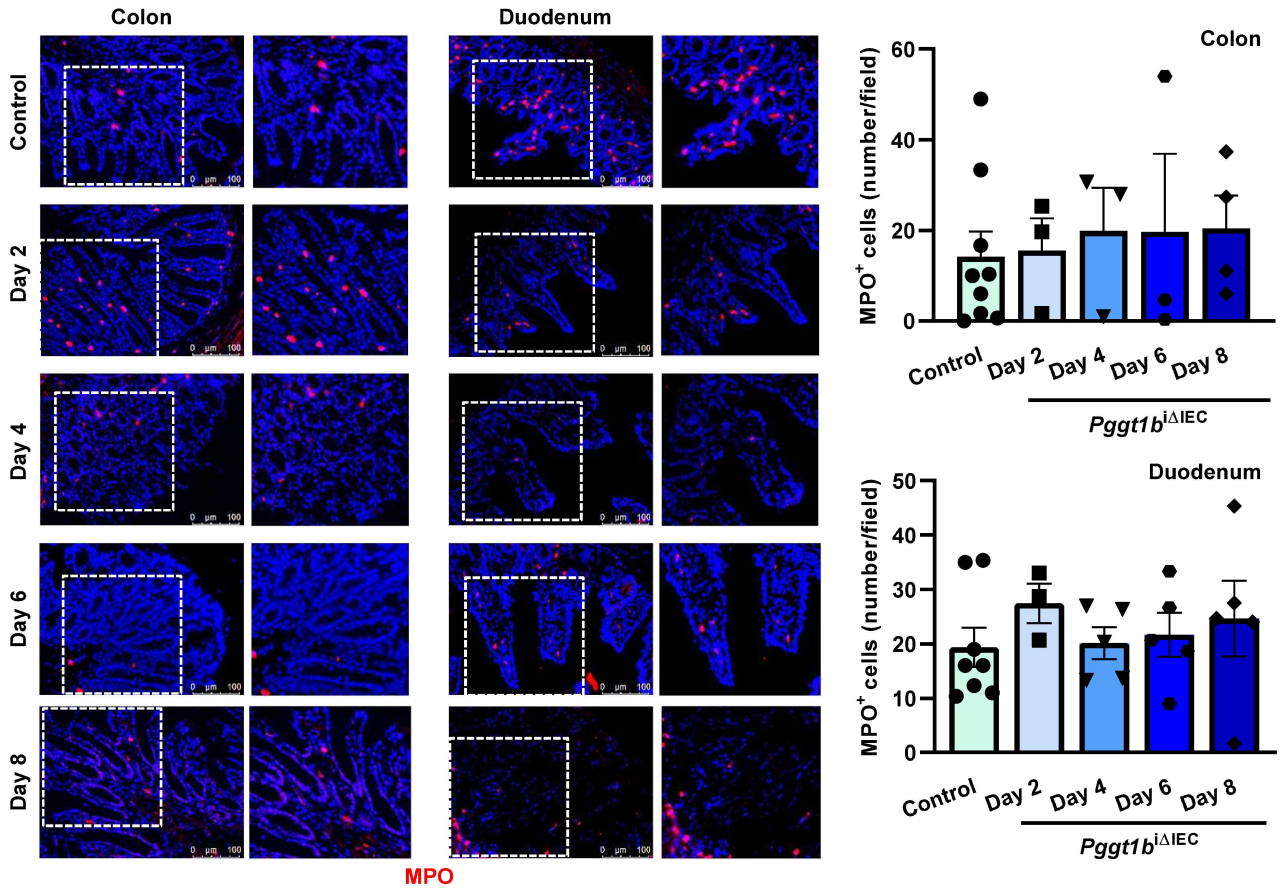

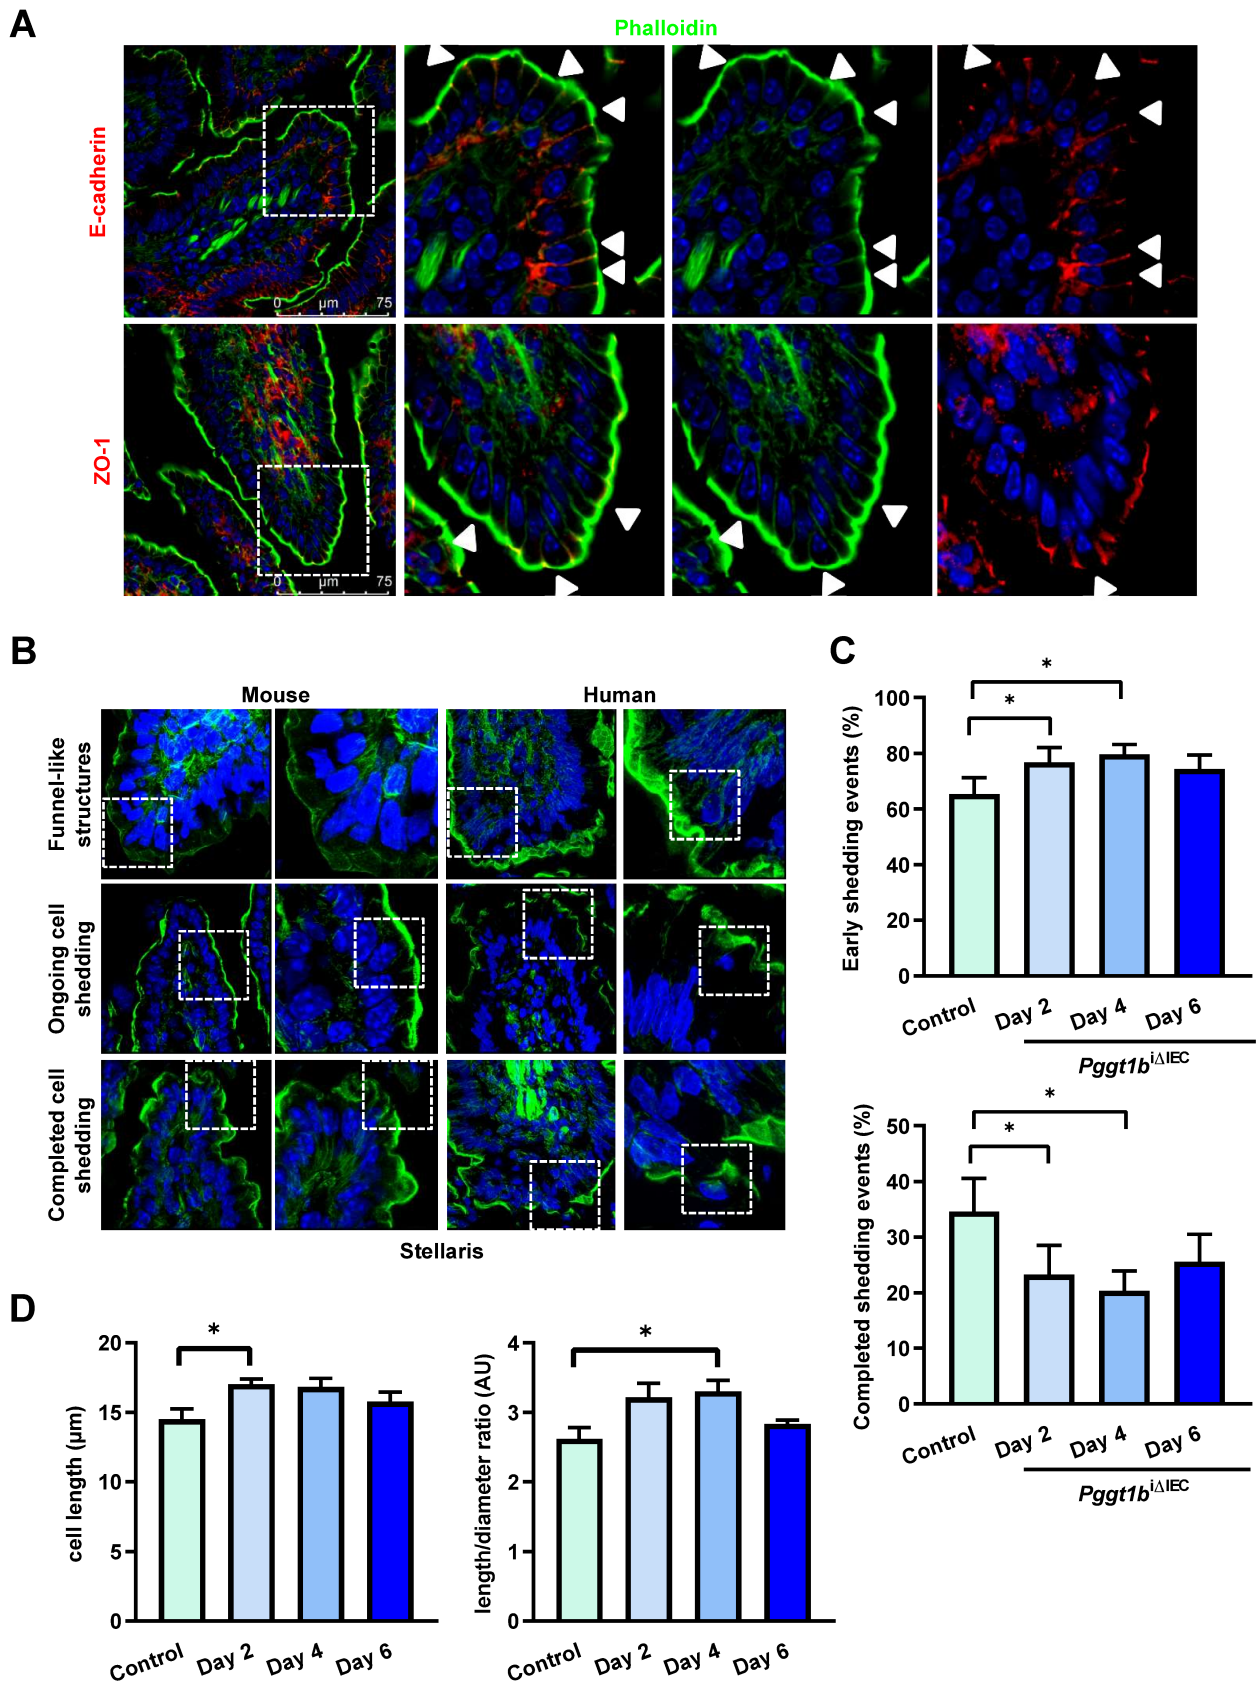

Suppl. Figure 2: Cell shedding alterations

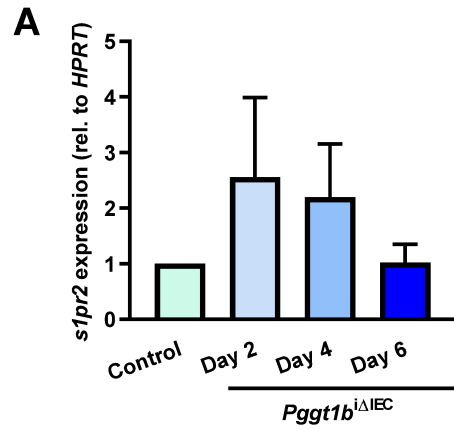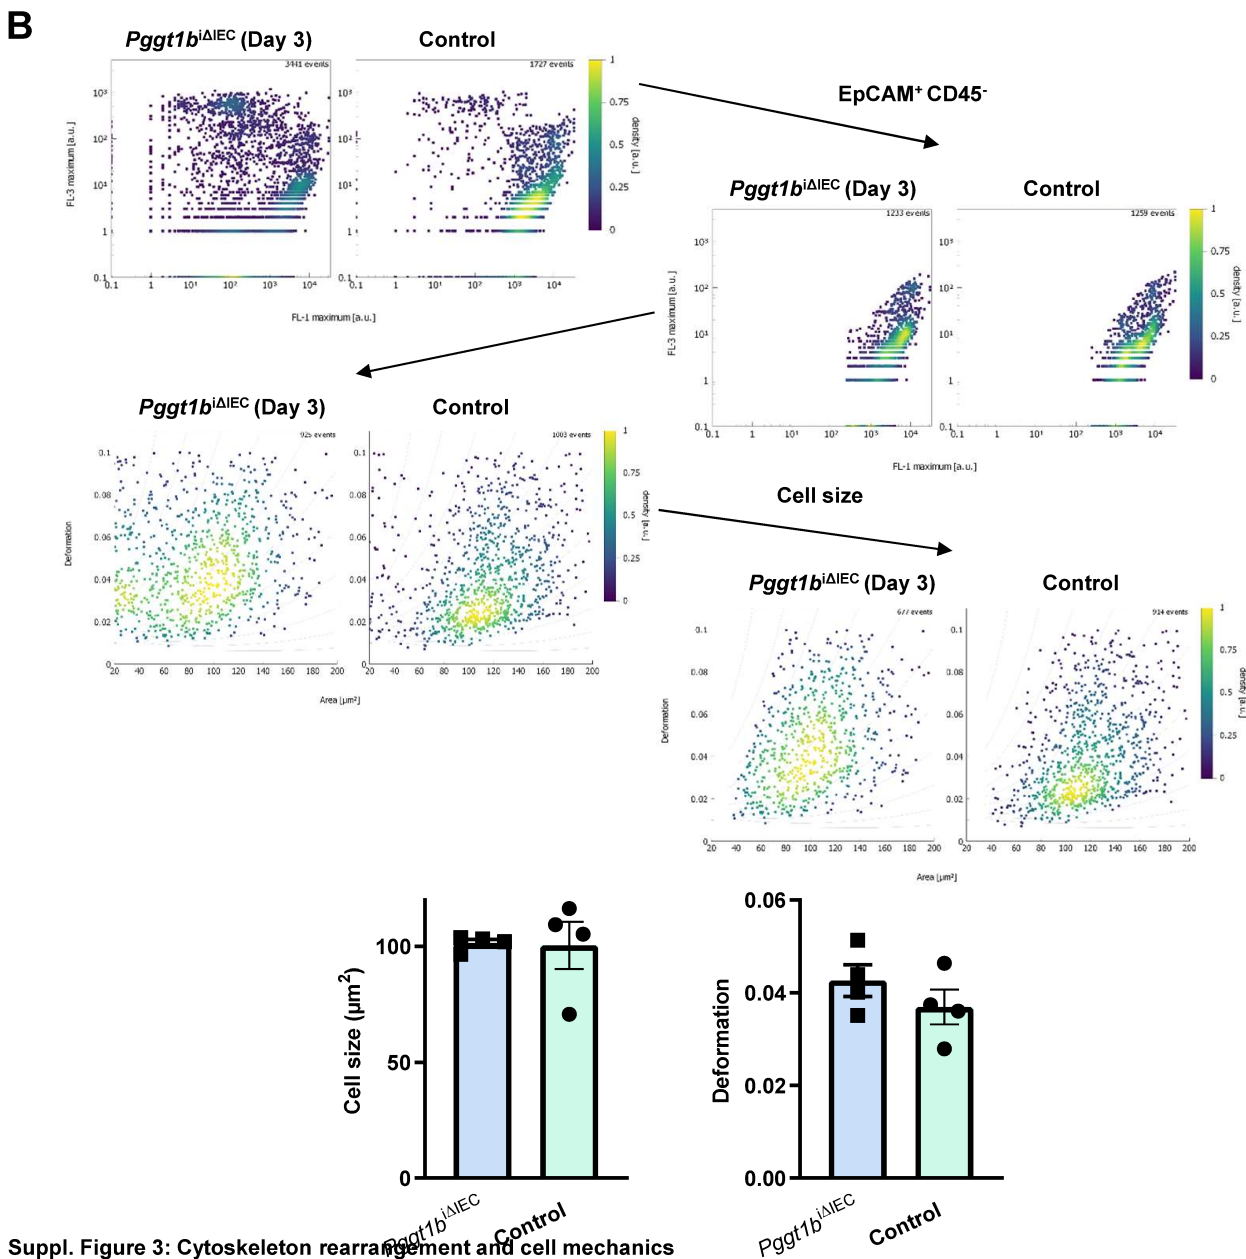

Suppl. Figure 3: Cytoskeleton rearrangement and cell mechanics

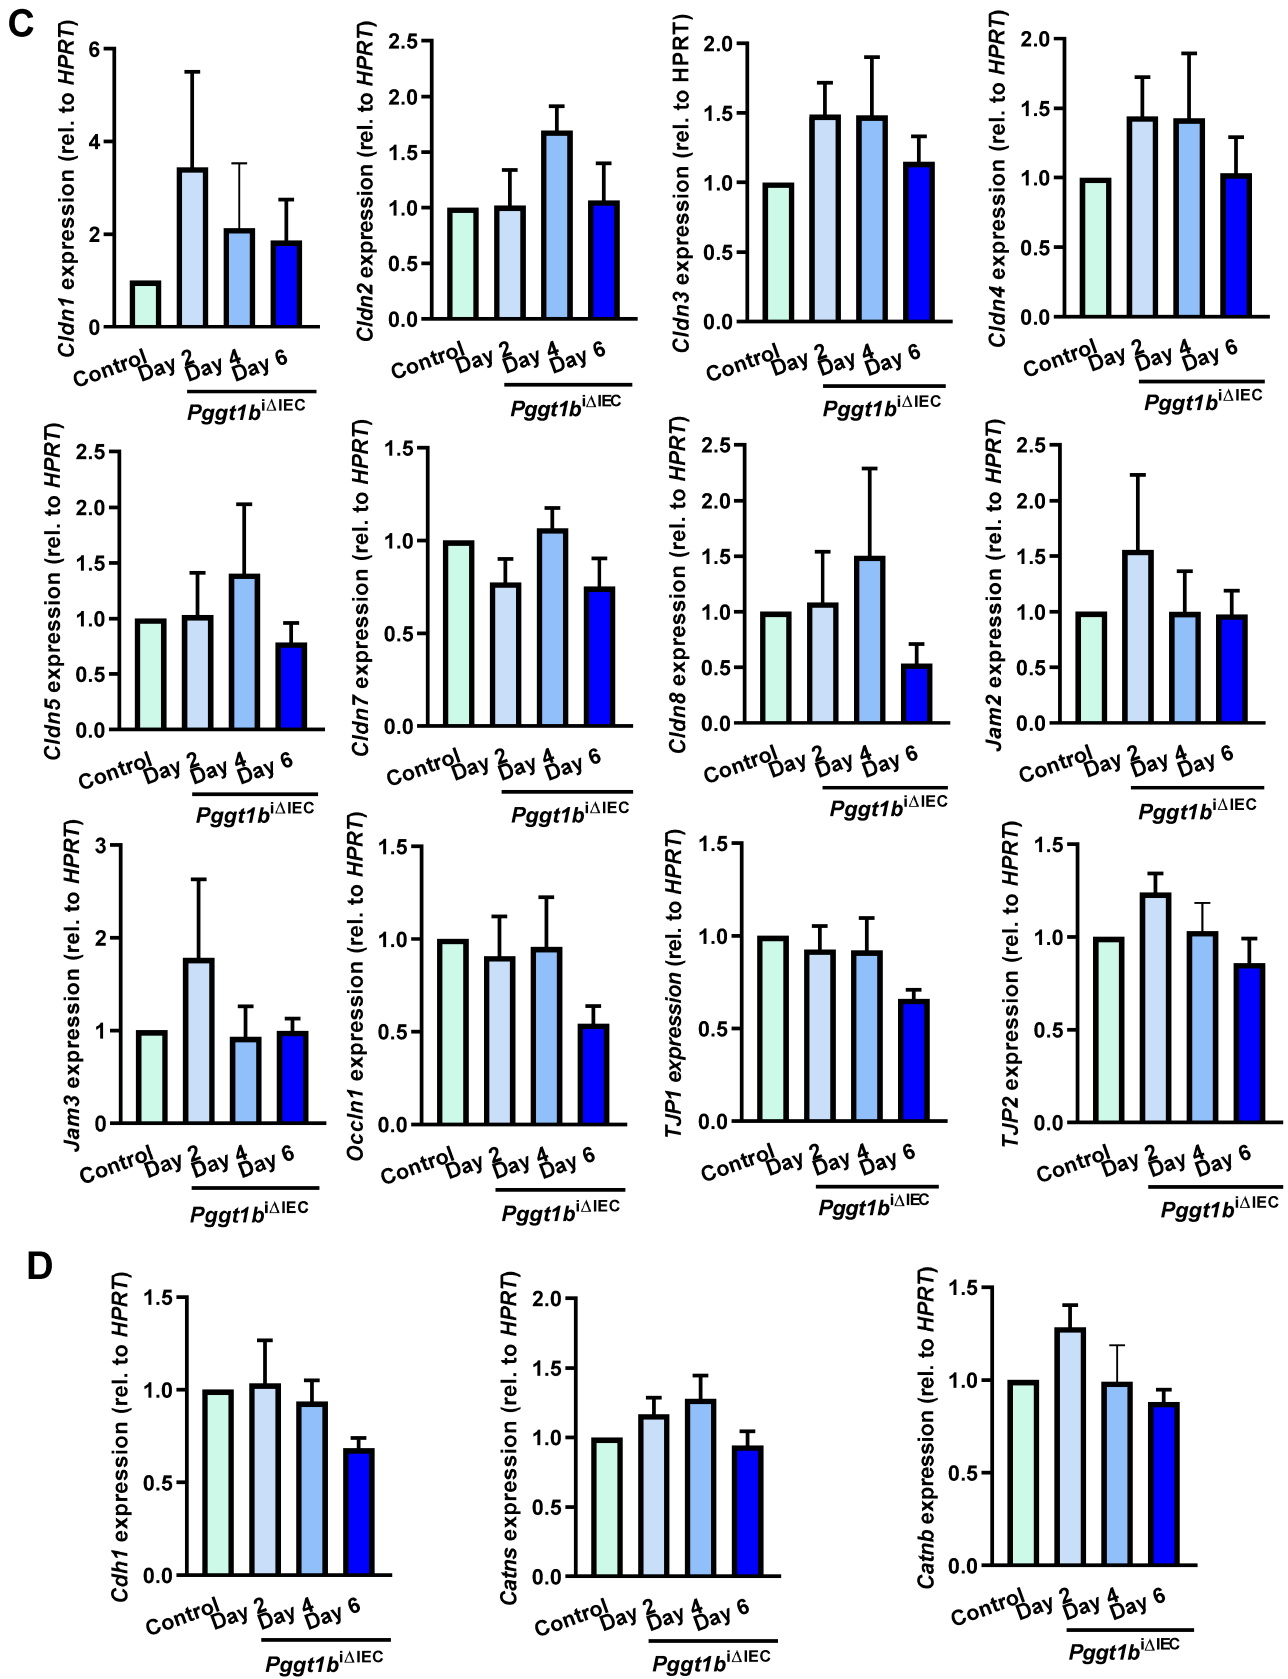

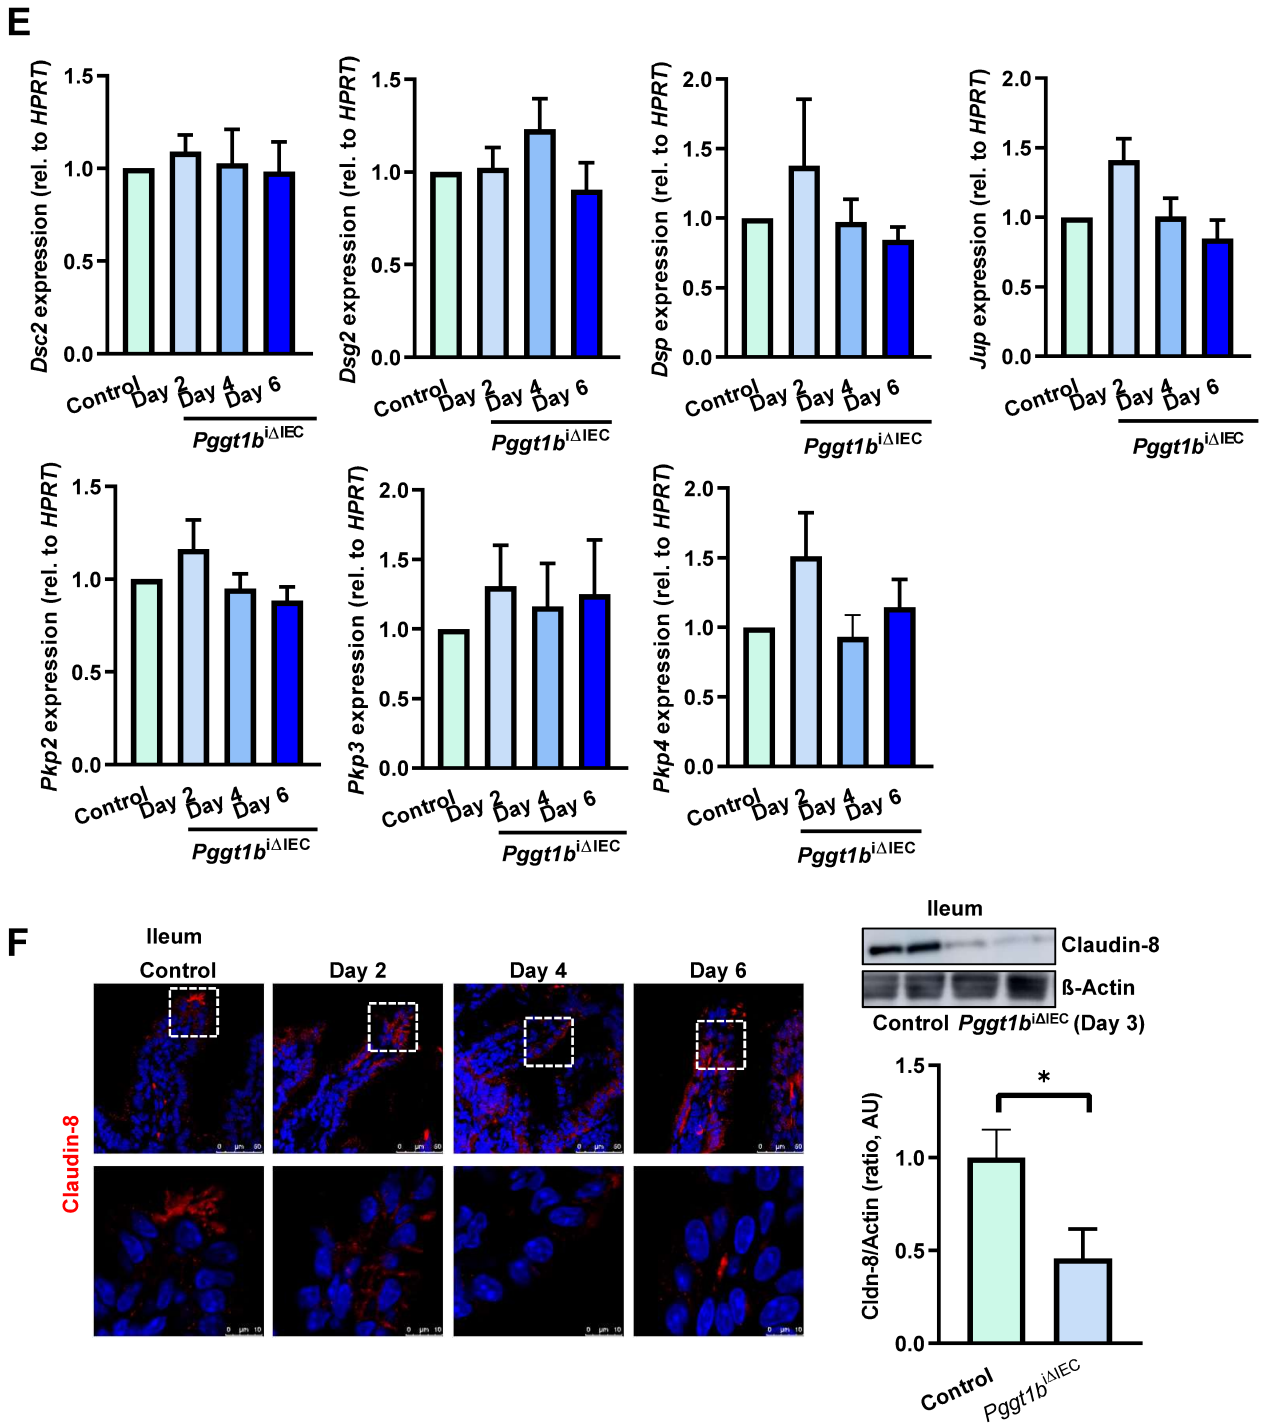

Suppl. Figure 3: Cytoskeleton rearrangement and cell mechanics

G

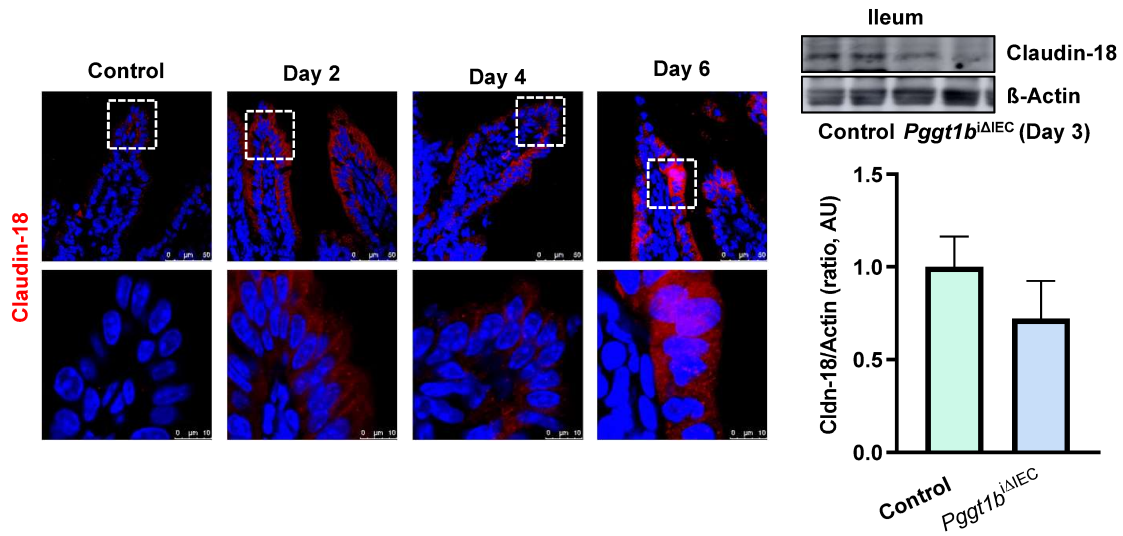

H

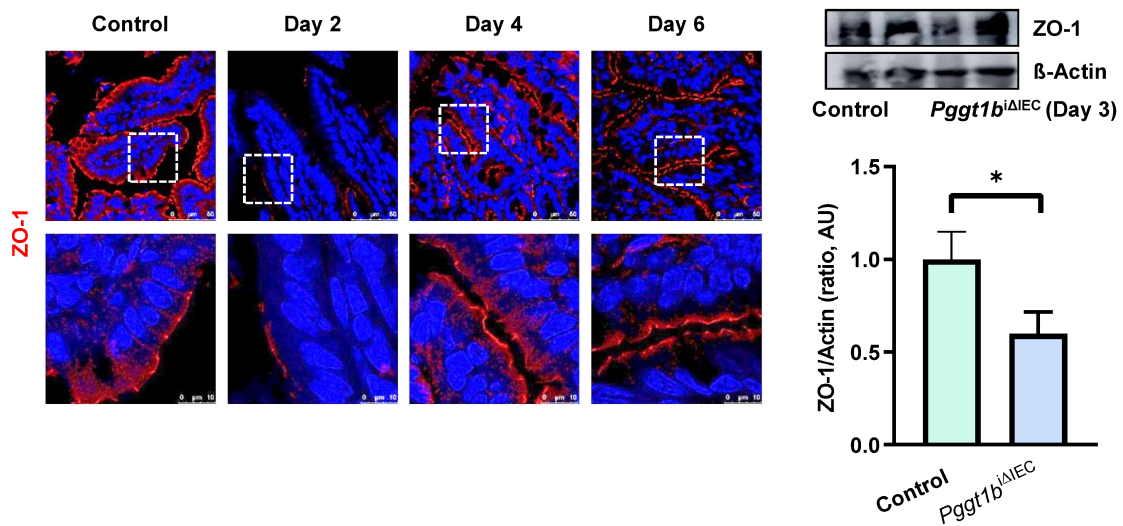

I

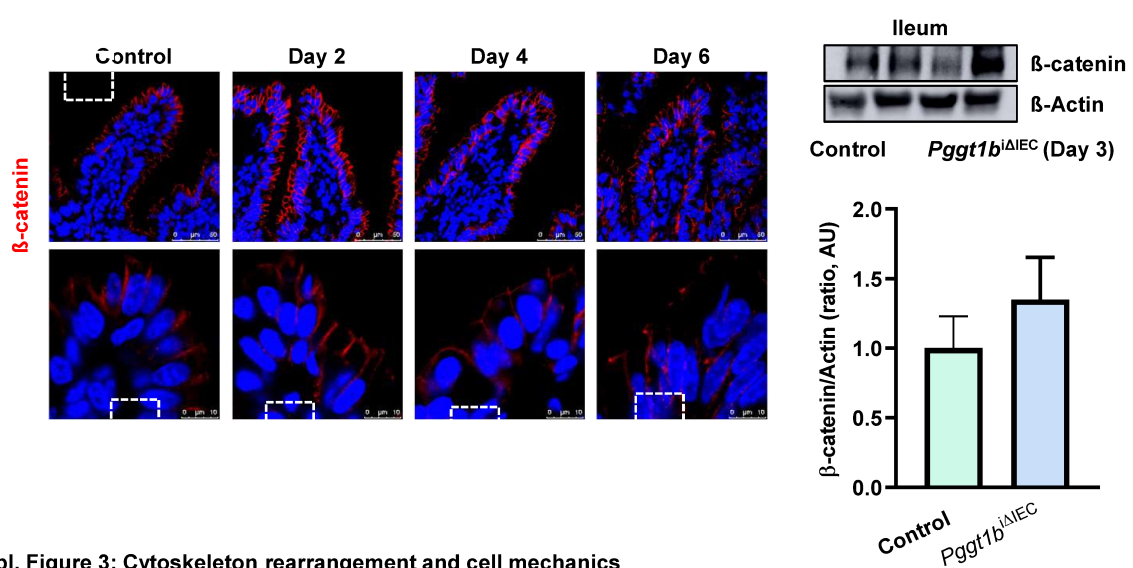

Suppl. Figure 3: Cytoskeleton rearrangement and cell mechanics



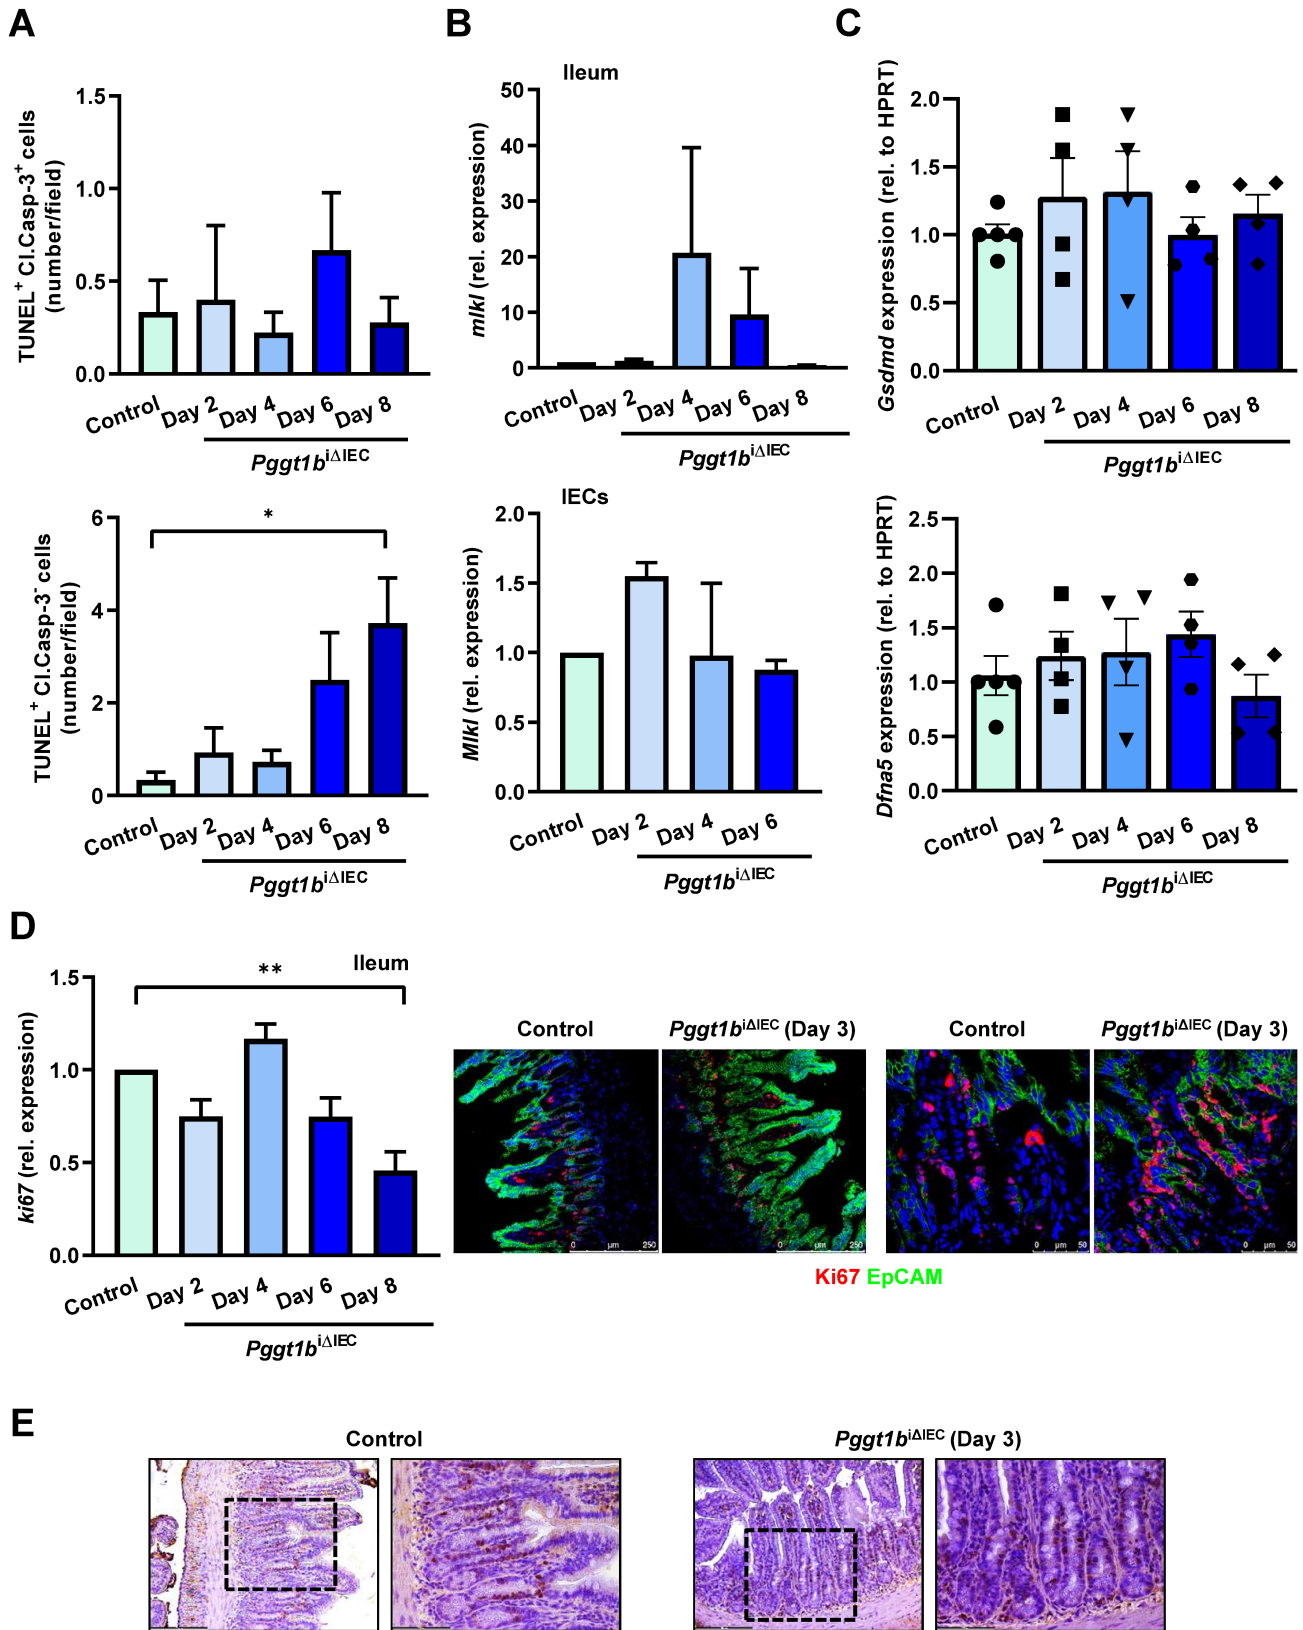

Suppl. Figure 4: Alternative molecular mechanisms in GGTase conditional KO mice

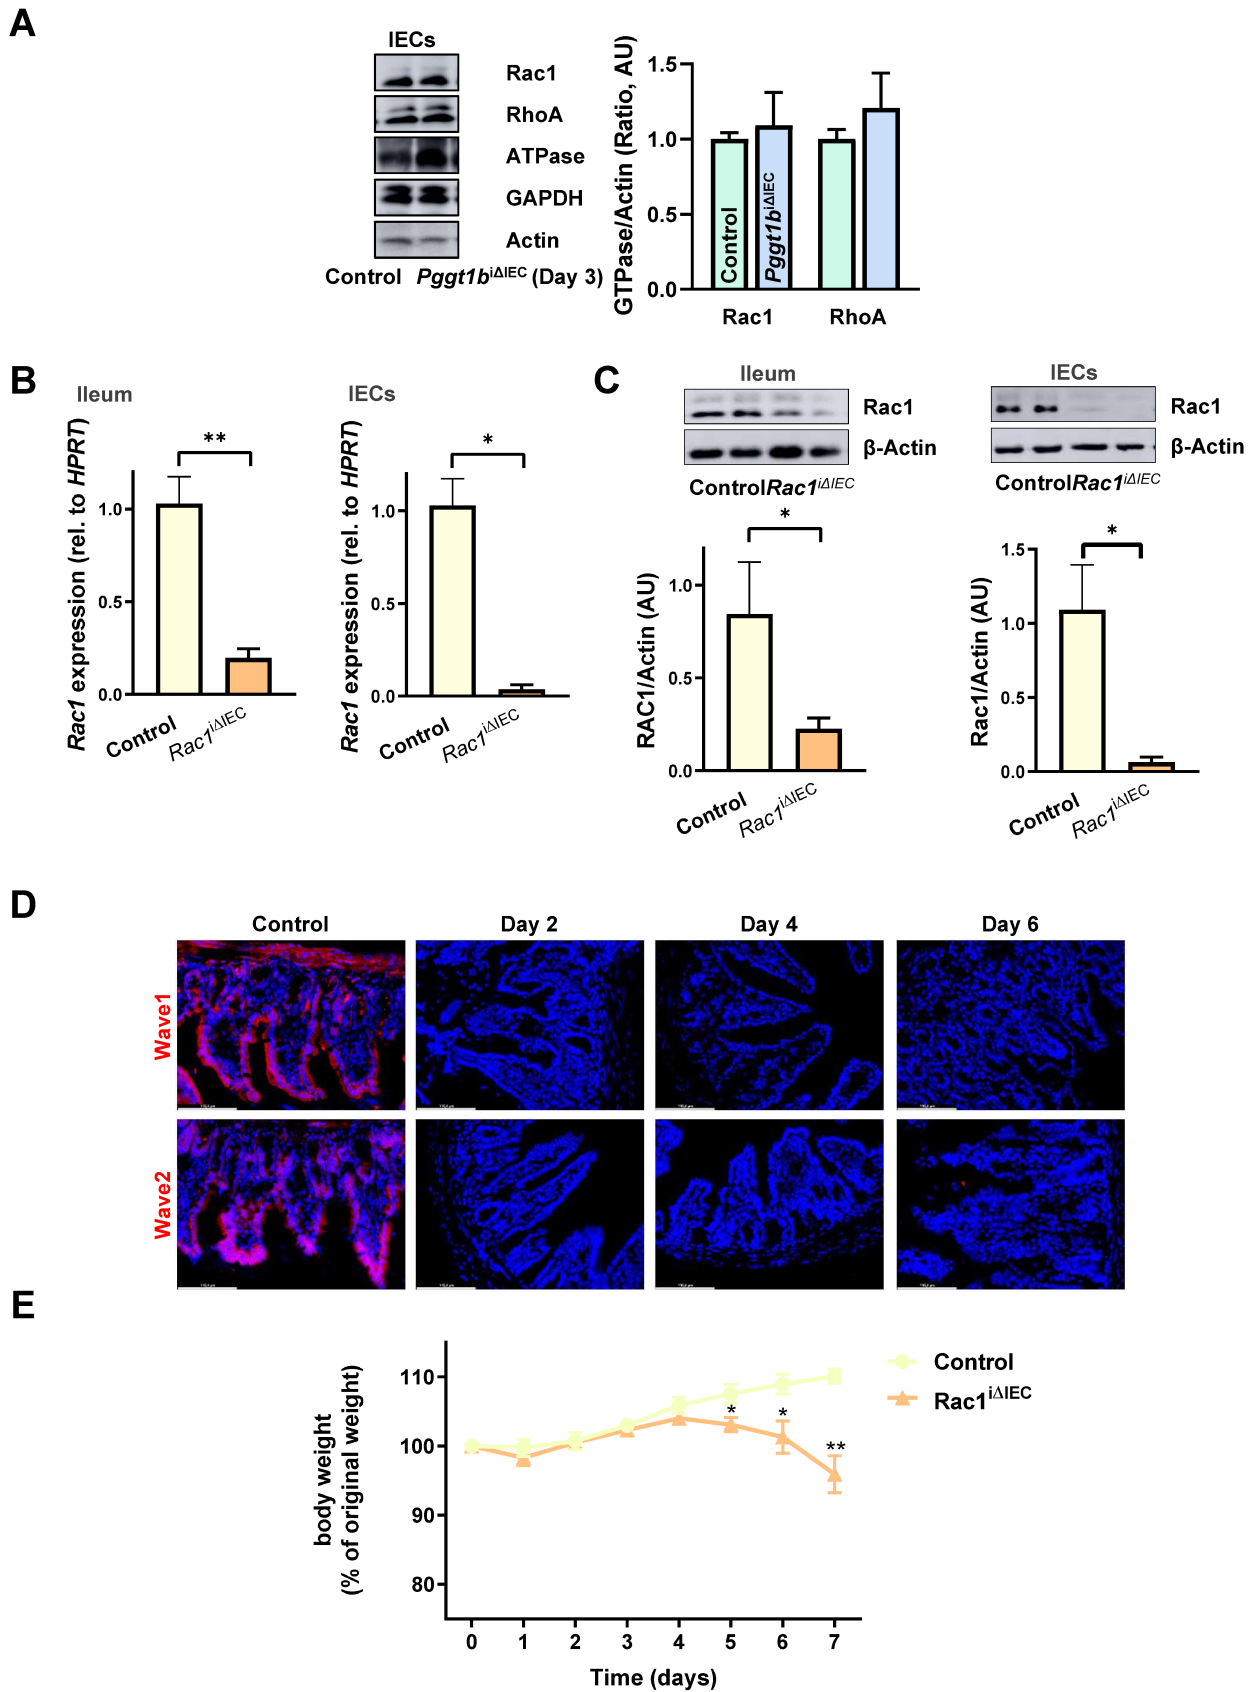

Suppl. Fig. 5: Rac1 conditional knock-out mice

F

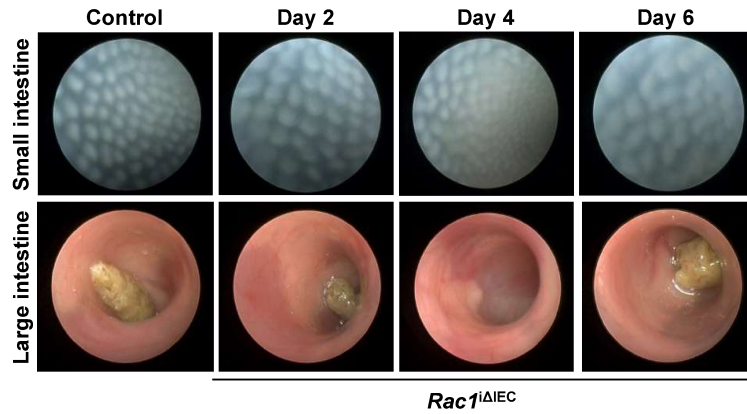

G

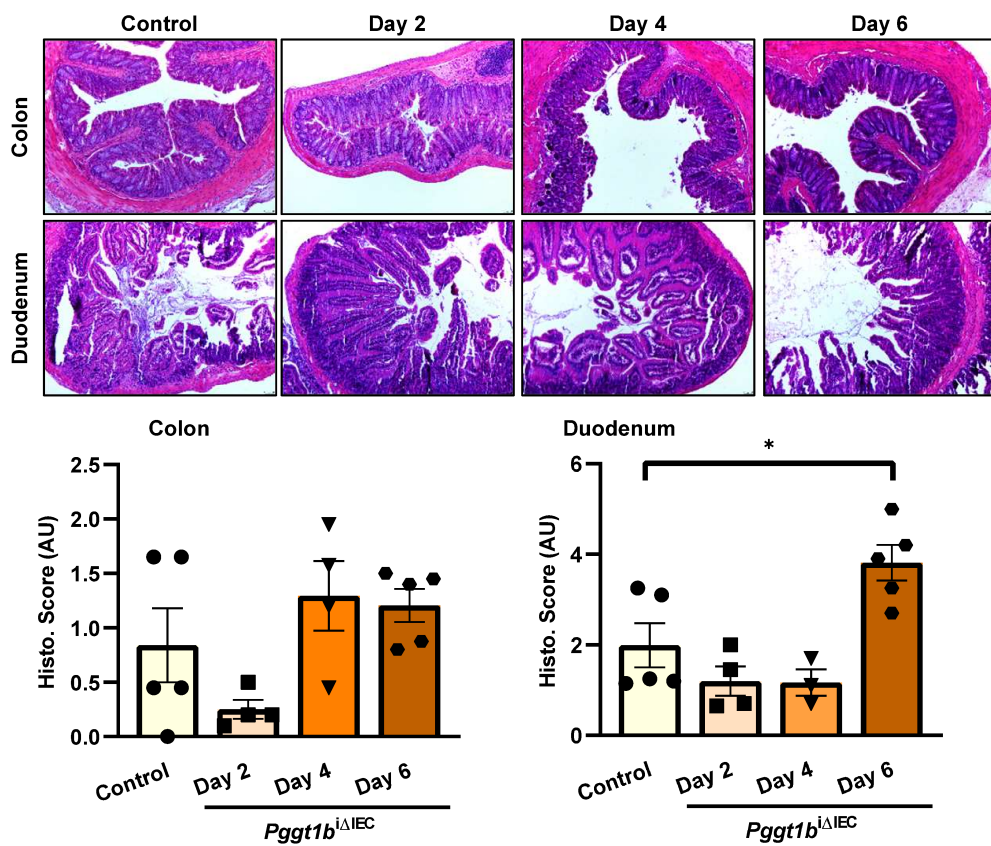

H

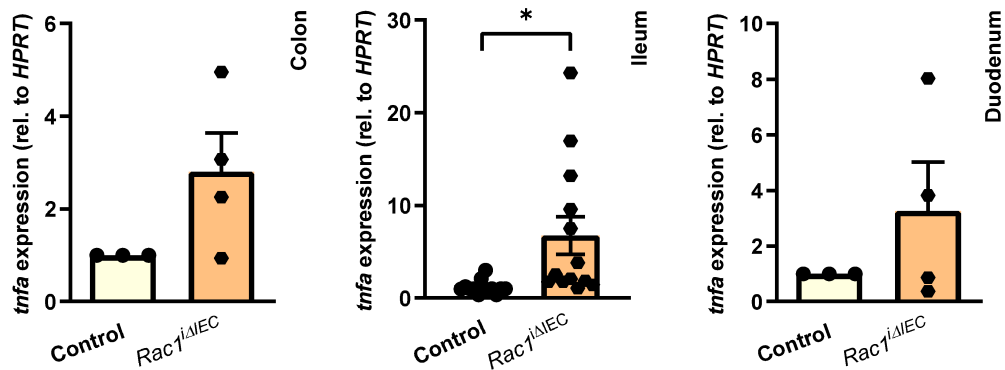Suppl. Fig. 5: *Rac1* conditional knock-out mice

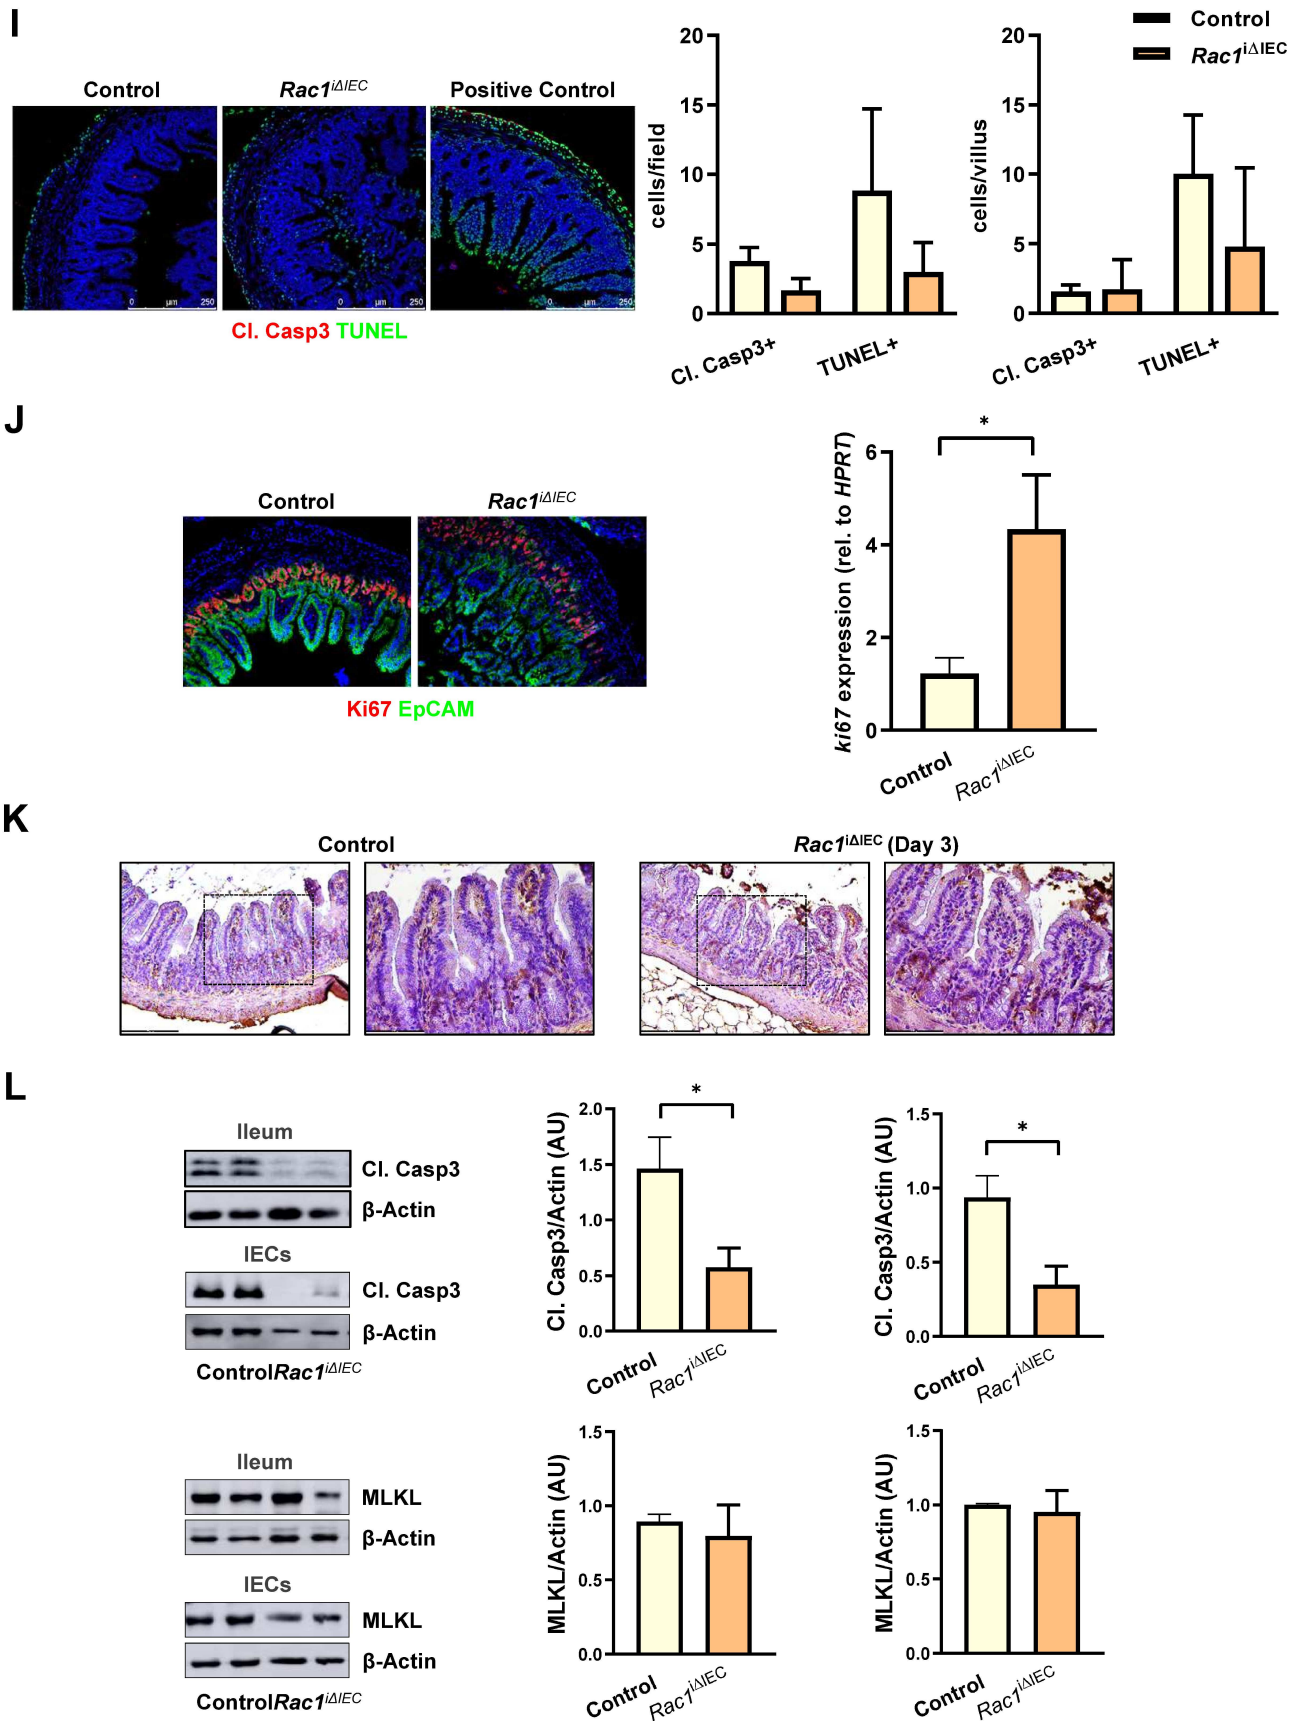

M

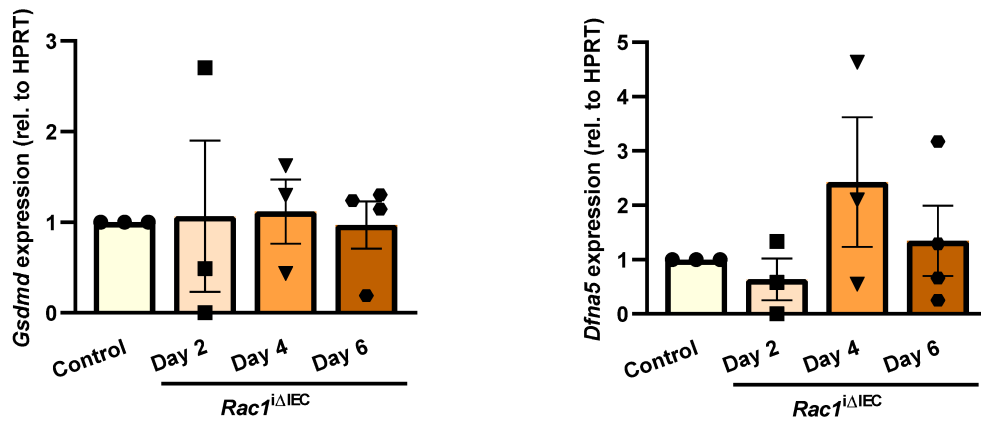

N

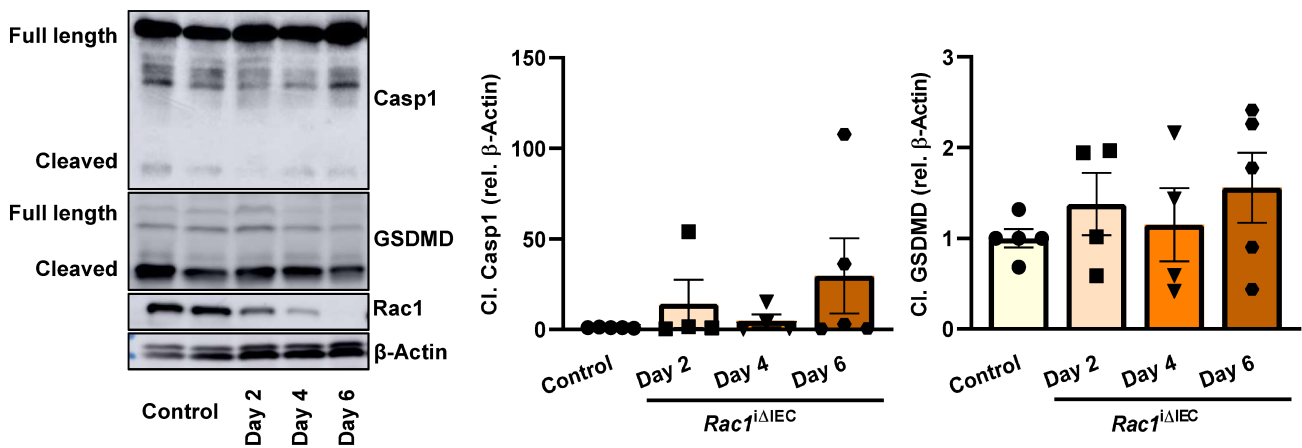

O

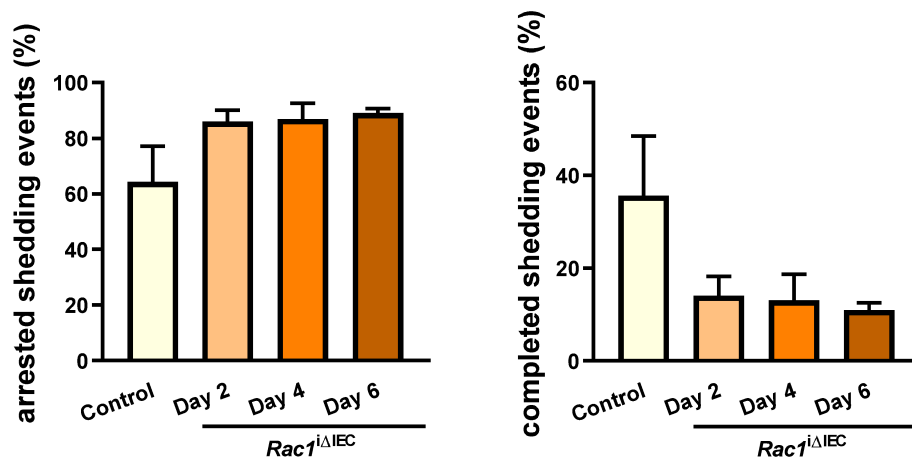Suppl. Fig. 5: *Rac1* conditional knock-out mice

**P**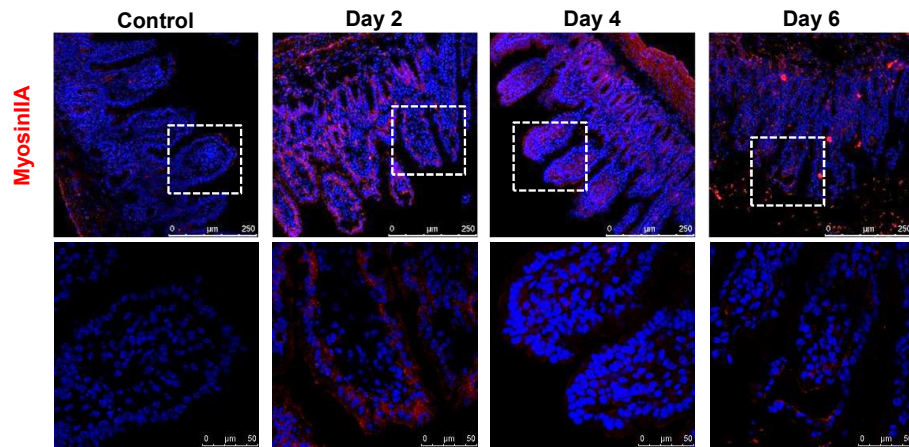**Q**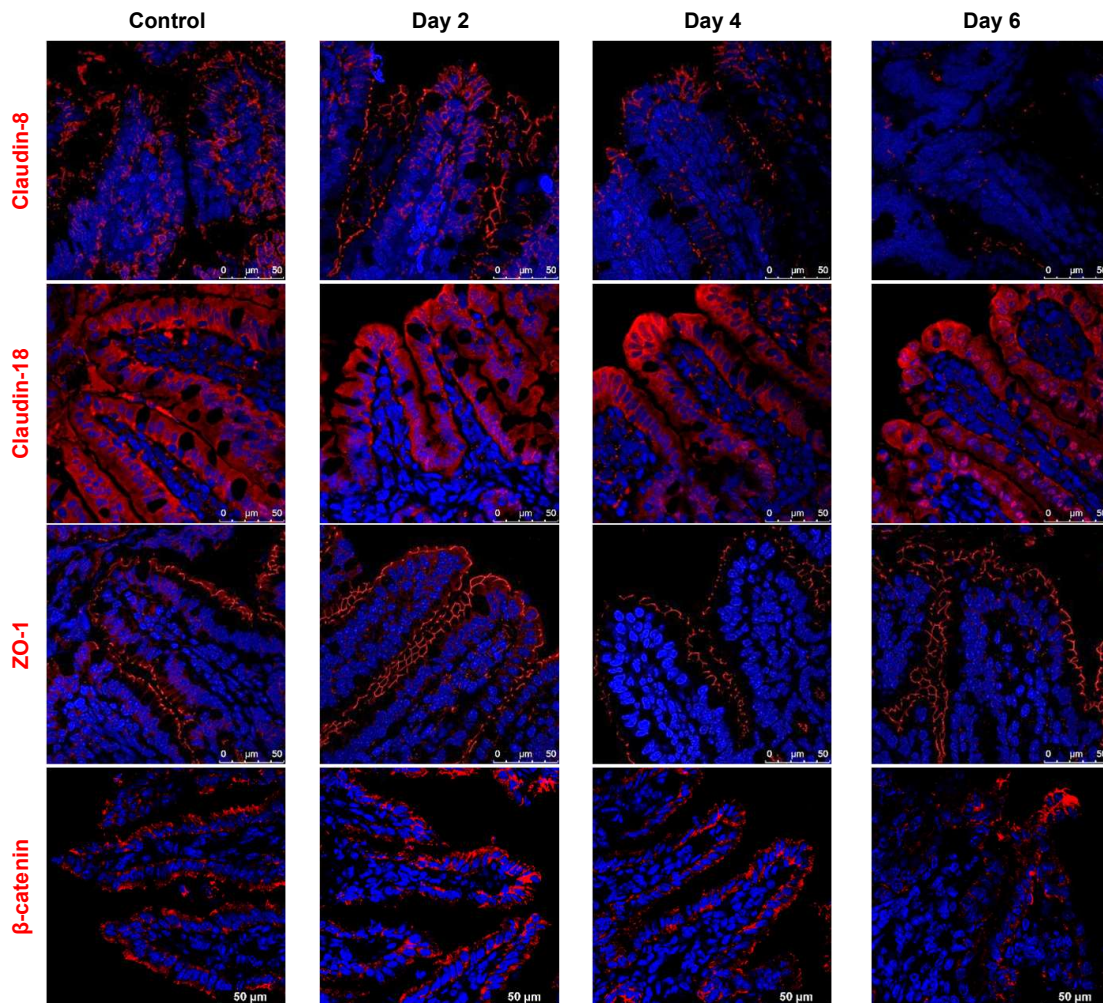

Suppl. Fig. 5: Rac1 conditional knock-out mice

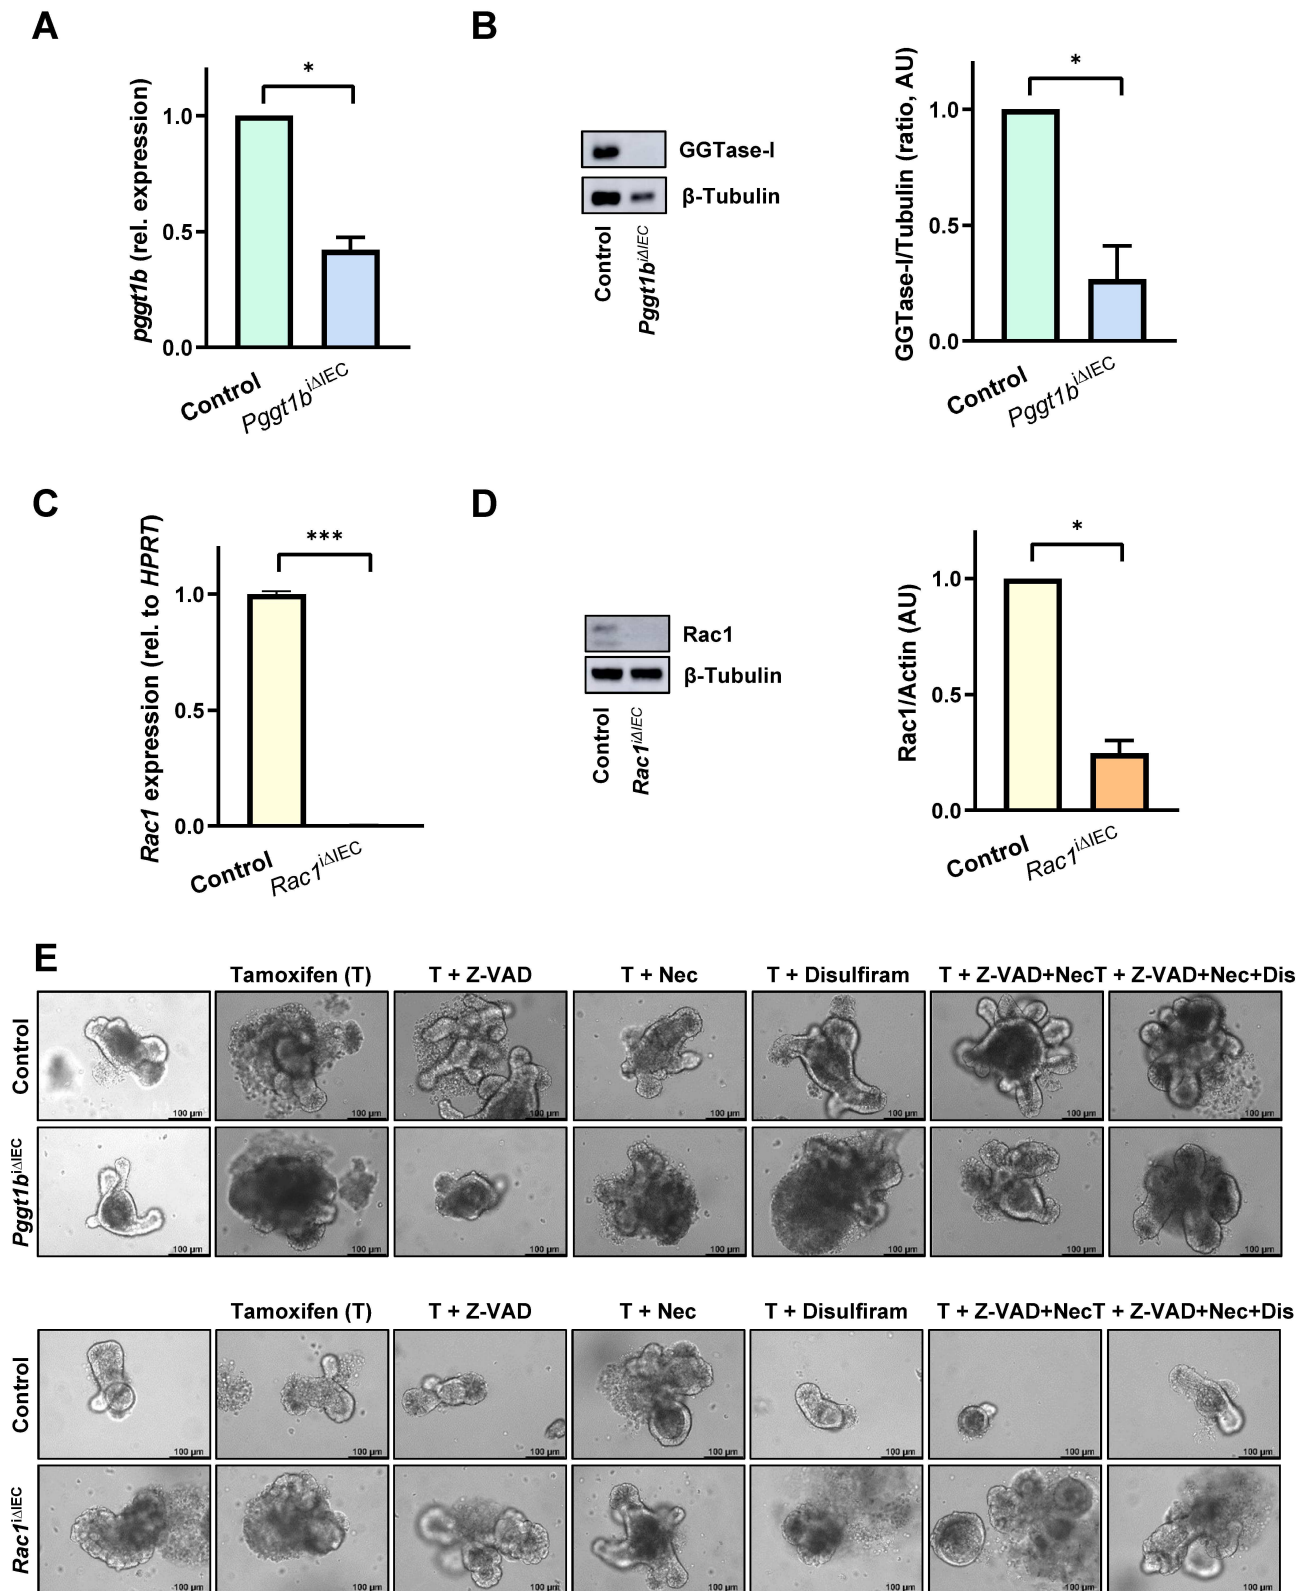

Suppl. Fig. 6: Organoids

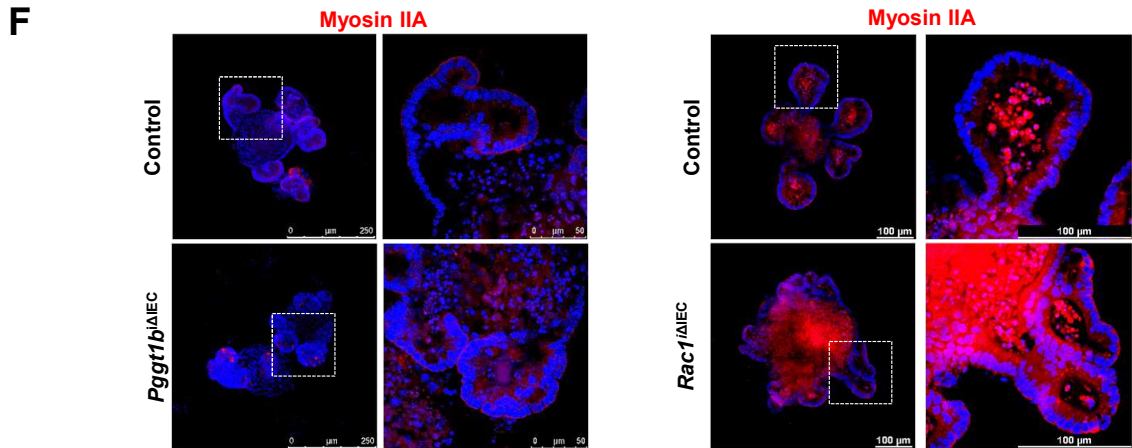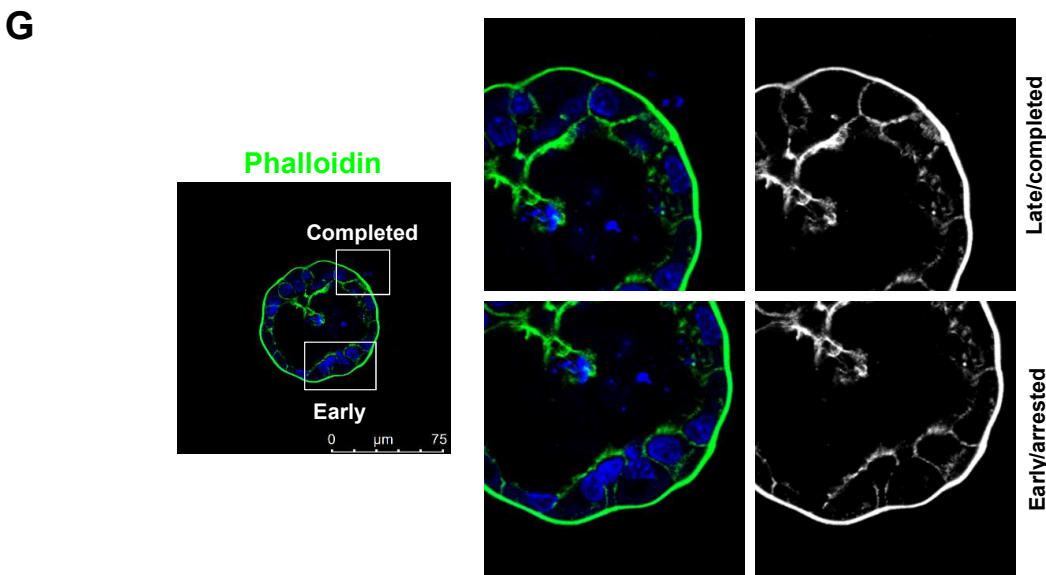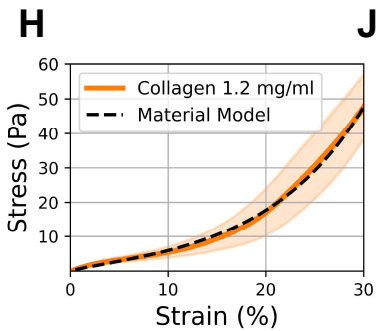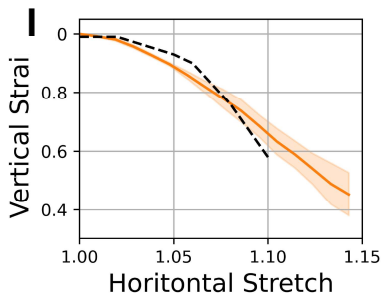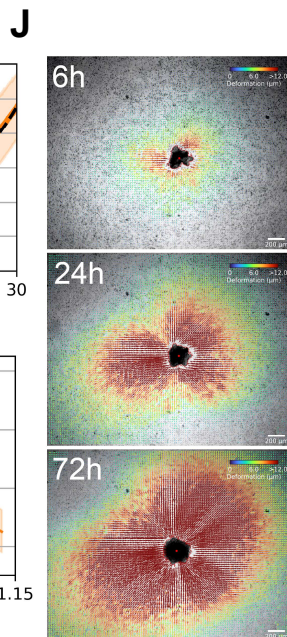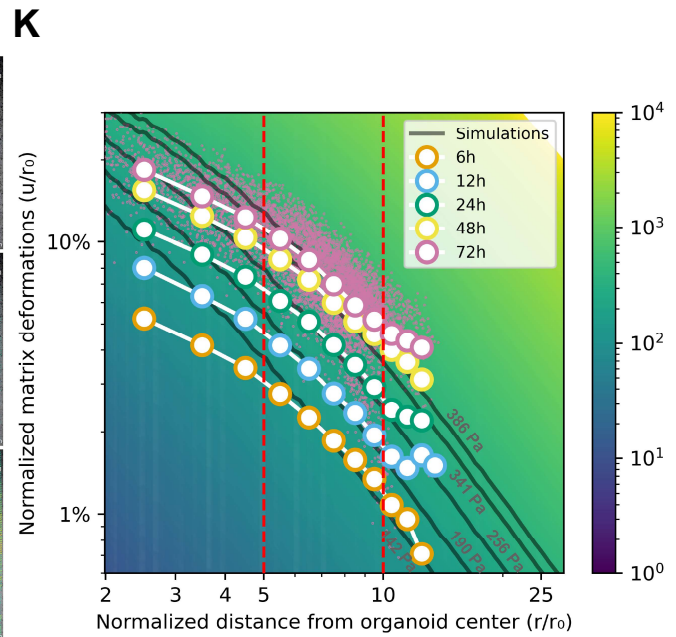

Suppl. Fig. 6: Organoids



**L**

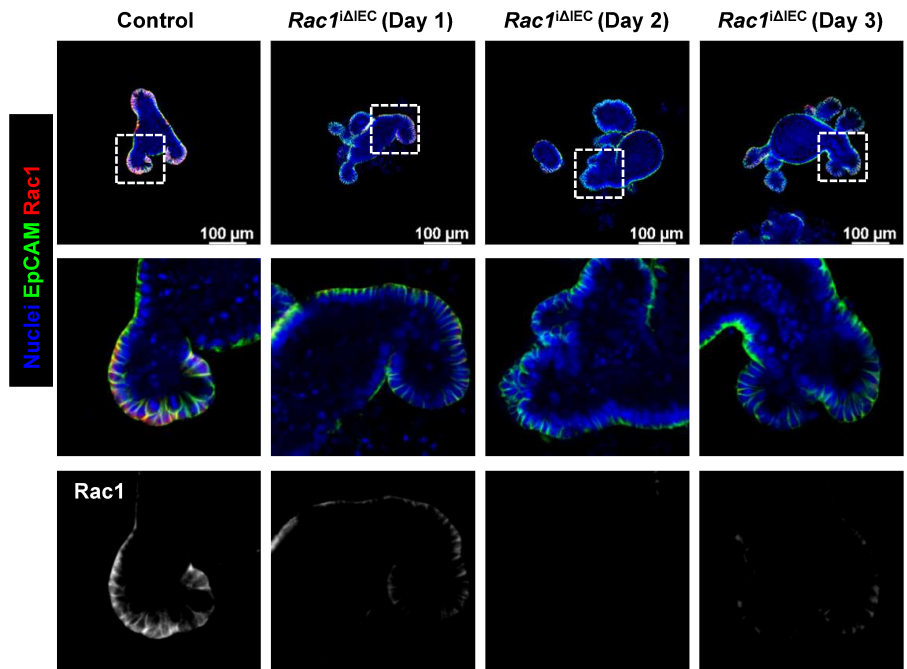

**M**

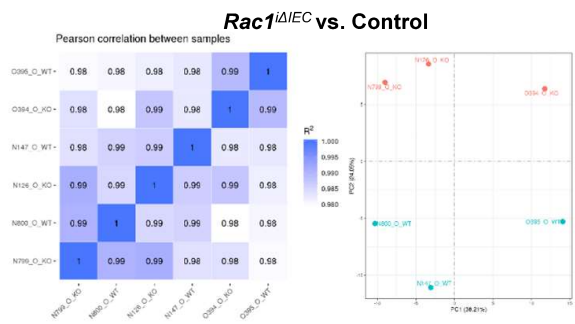

**N**

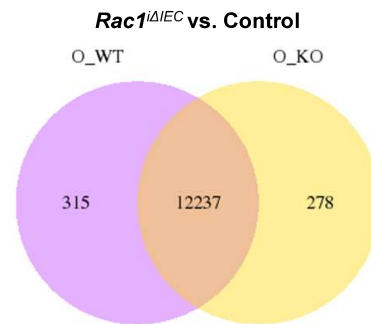

**O**

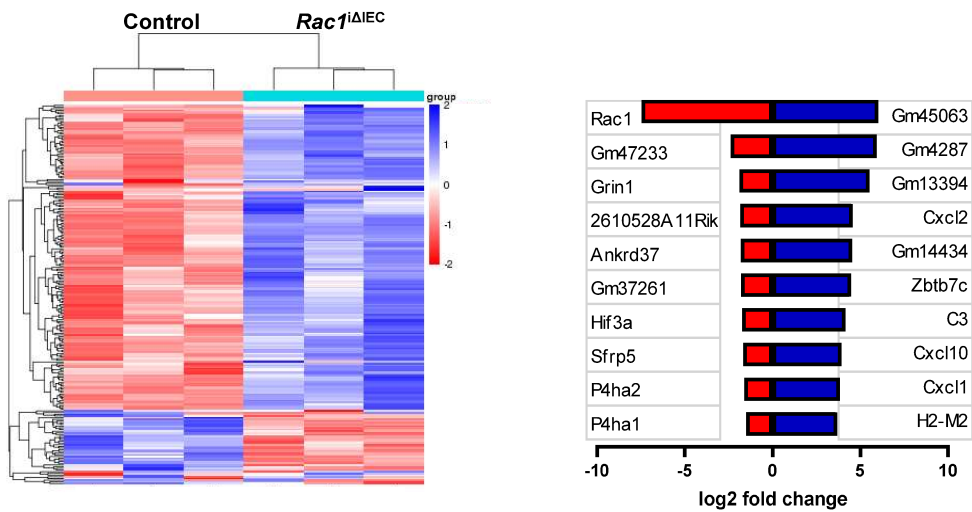

Suppl. Fig. 6: Organoids

**P**

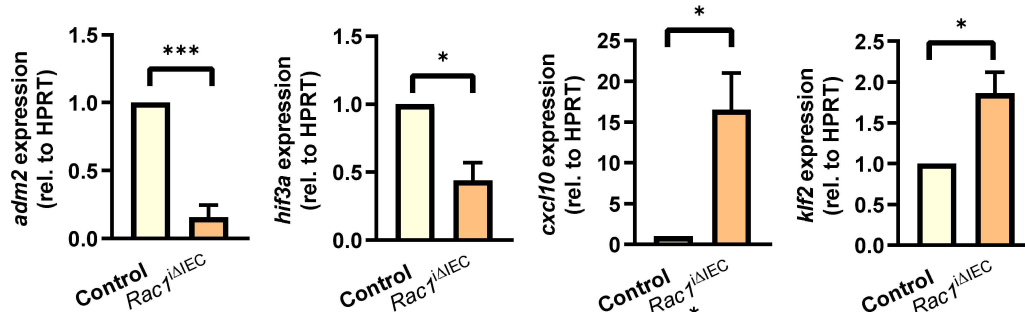

**Q**

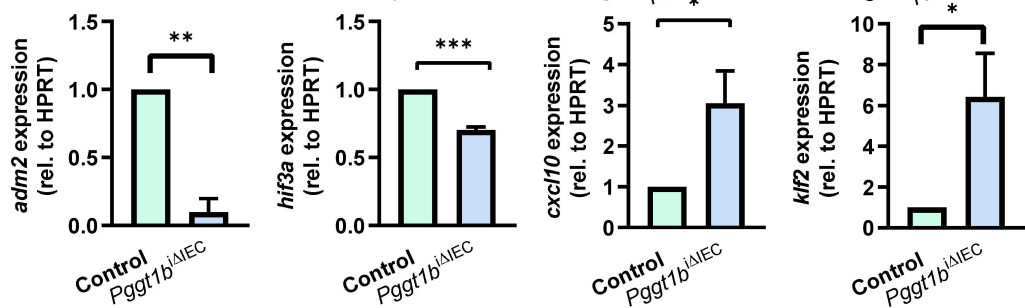

**R**

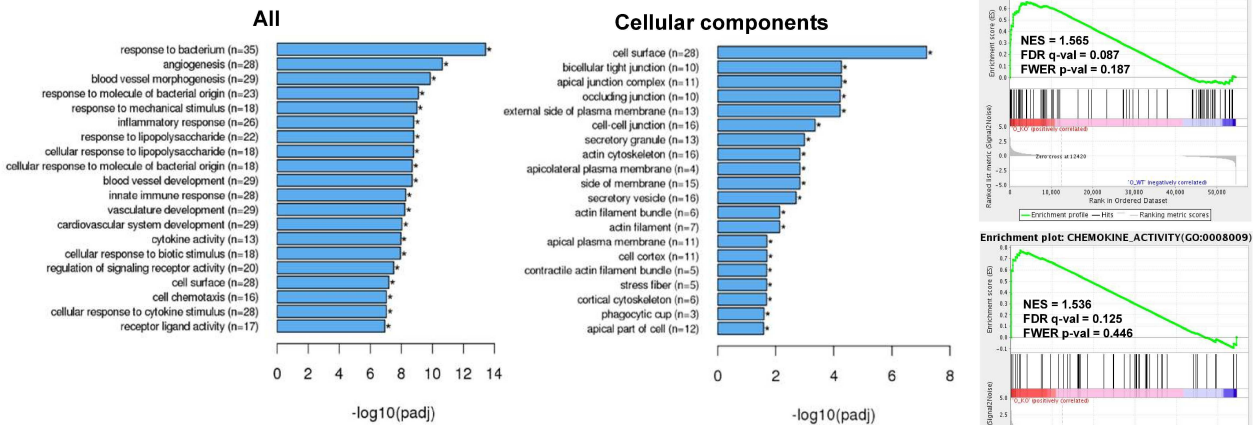

**S**

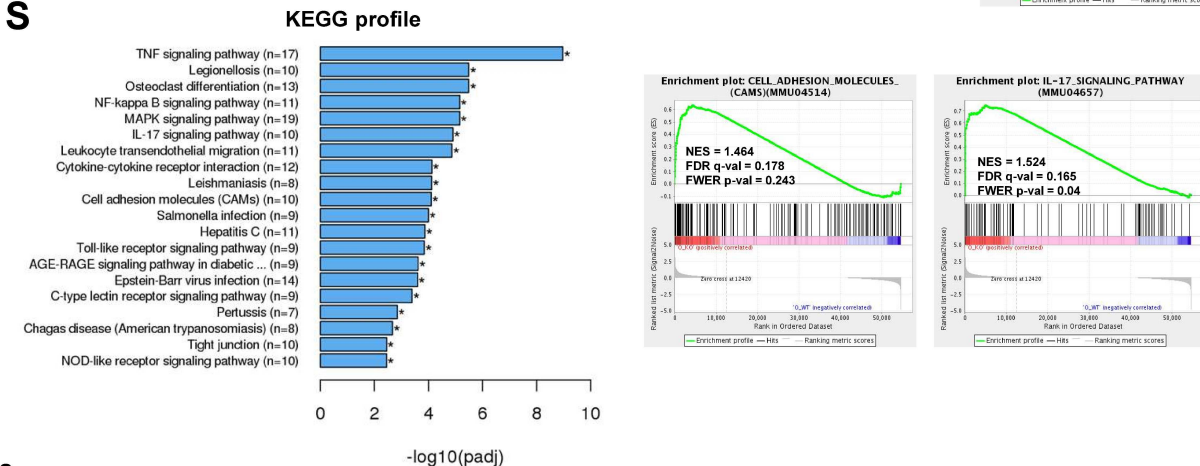

**S**

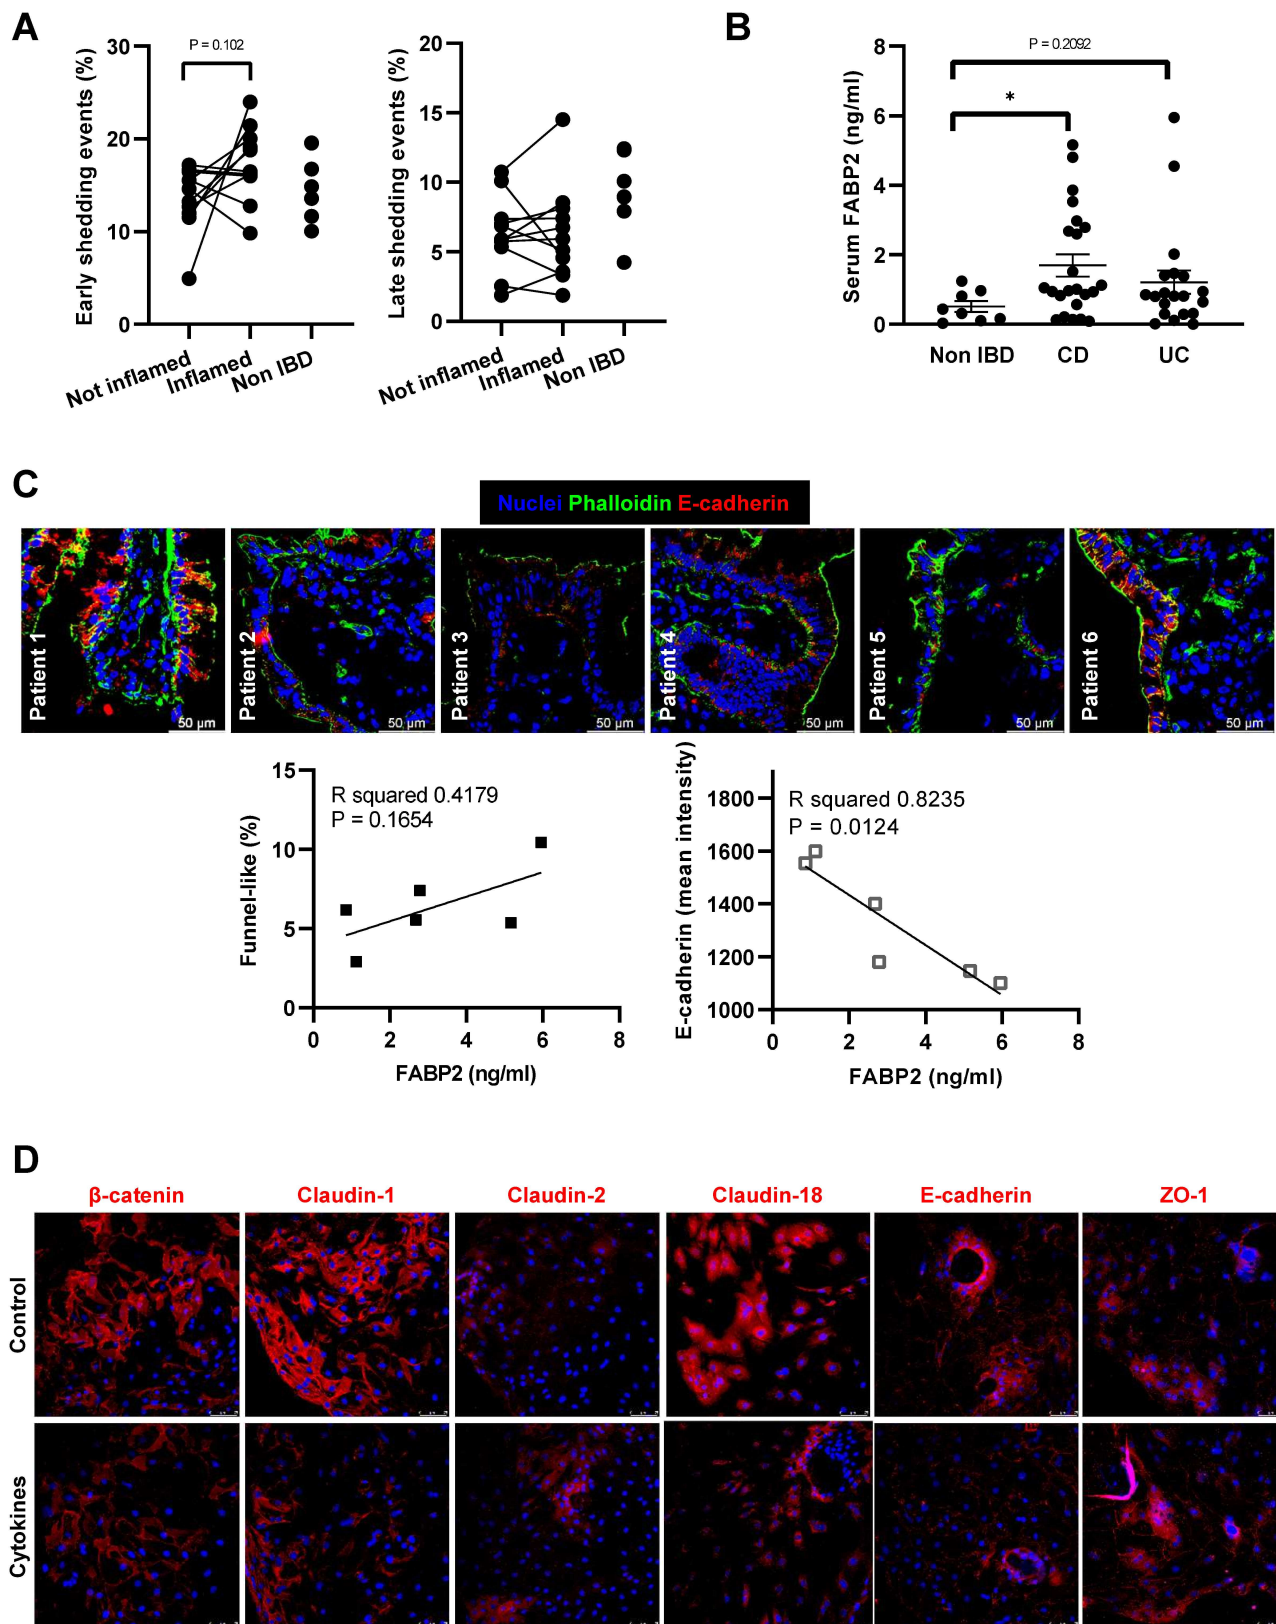

Suppl. Fig. 7: Cell shedding in IBD

E

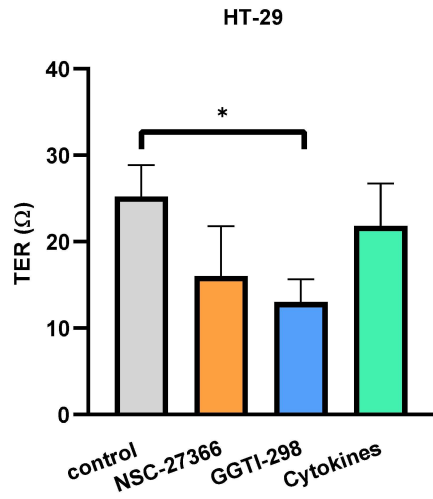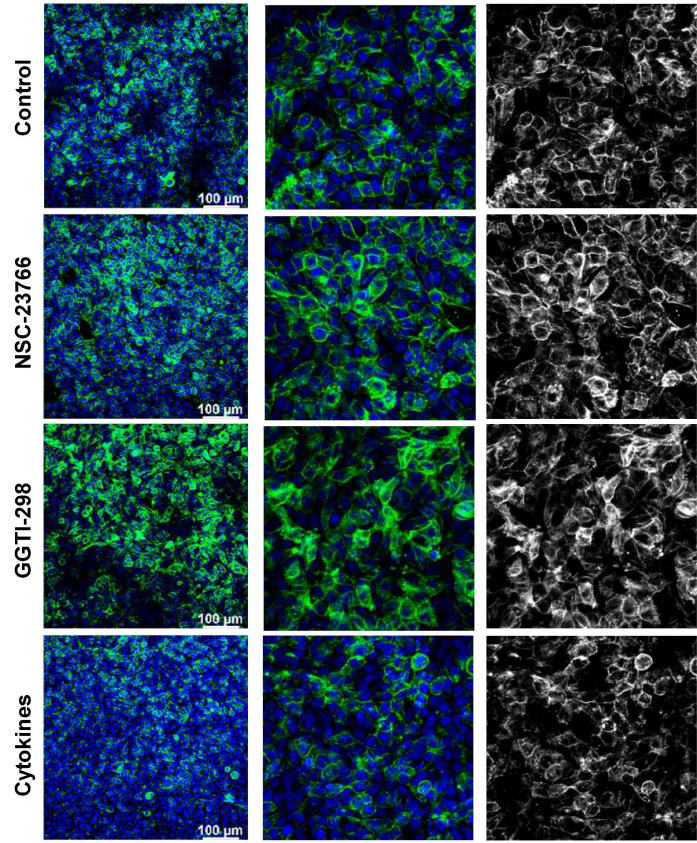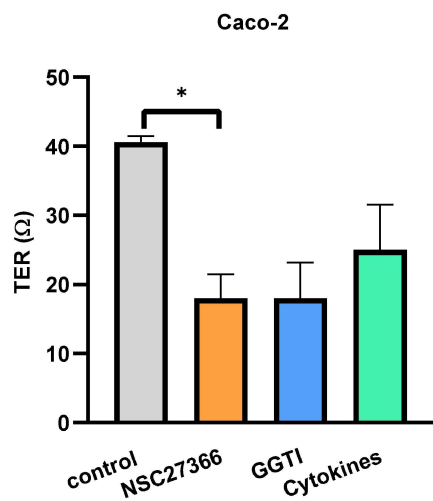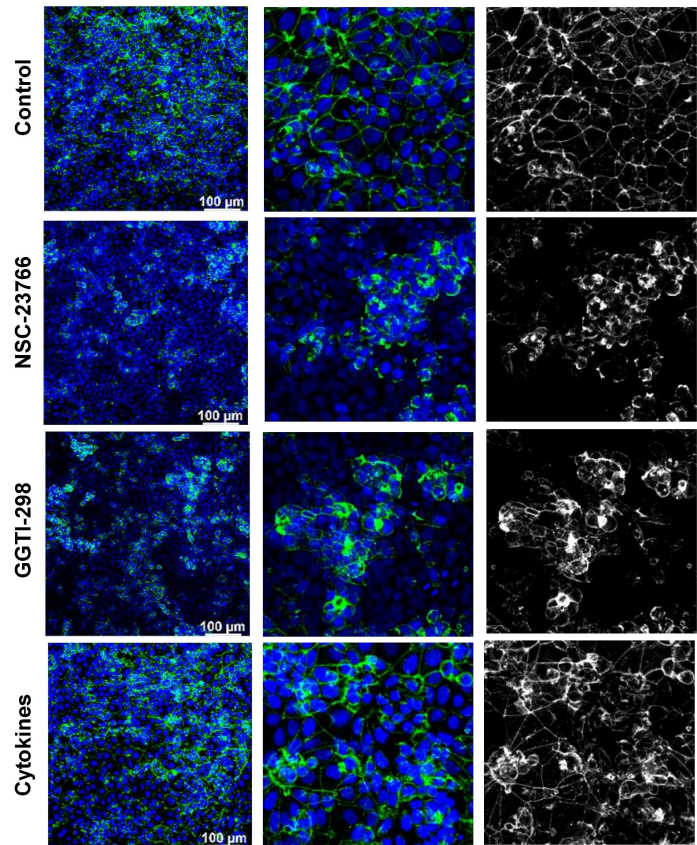

Suppl. Fig. 7: Cell shedding in IBD

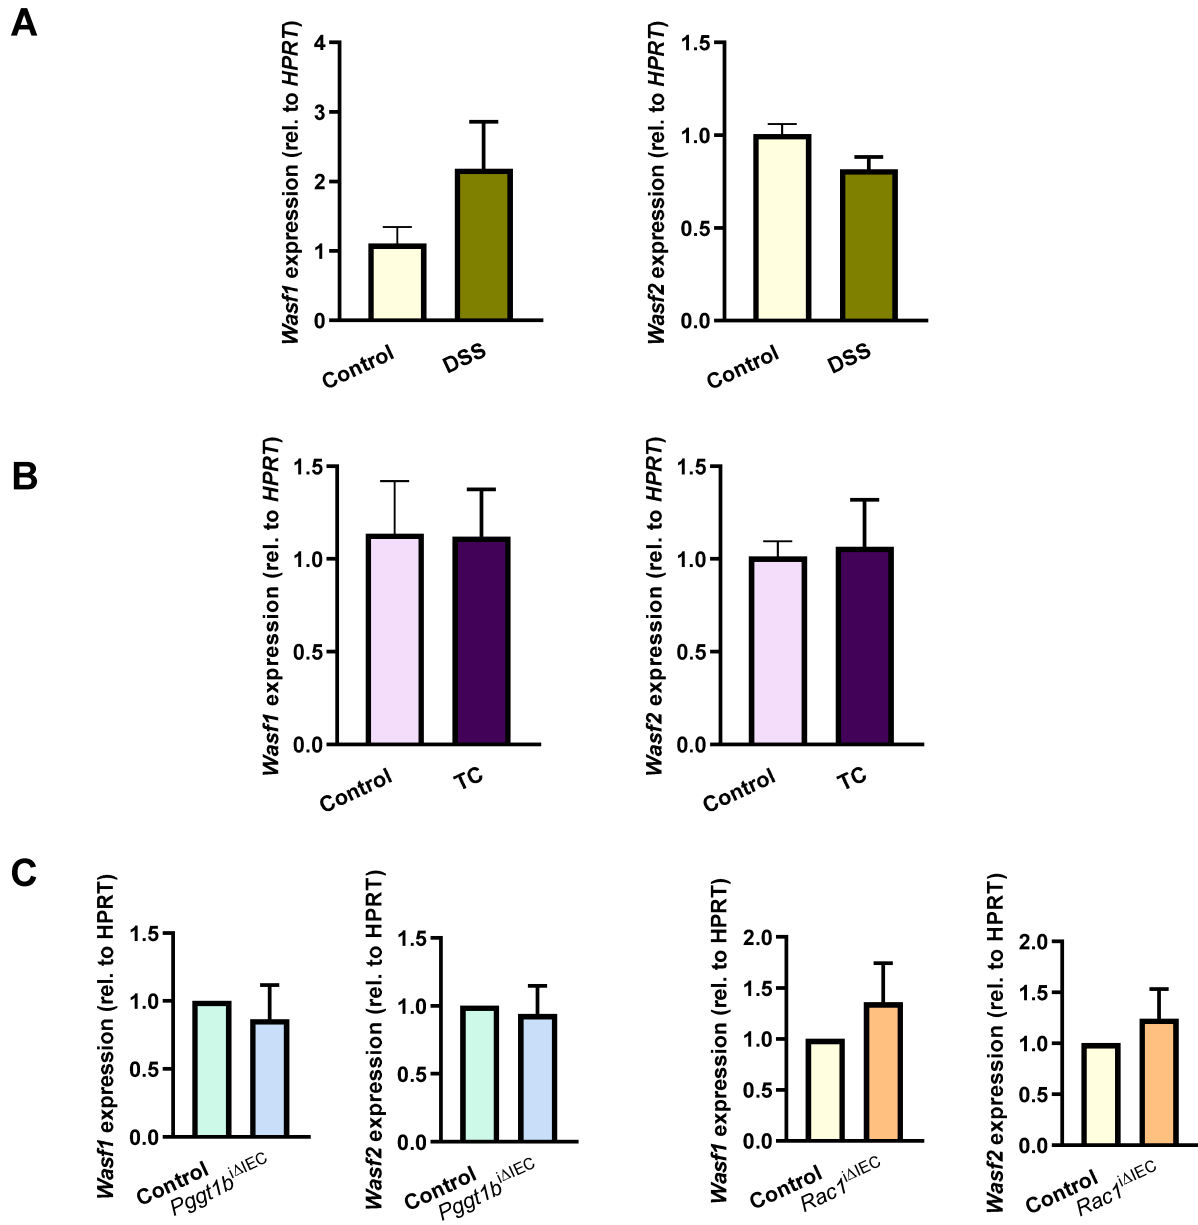

Supplementary Figure 8: Human RAC1
